# Supplementary material
Source: MDPI journal article supplement (https://www.mdpi.com/1999-4907/14/5/983)
Supplement: s1 [file s1]

Supplemental Table S1 Cloning primers

| Primer name             | Primer sequence (5' to 3')  |
|-------------------------|-----------------------------|
| CCD4-1F                 | ATGGATGCTTTCTCTTCTACTTTCCT  |
| CCD4-1R                 | CTACAGCTTATTAAGATCACTTTCCCG |
| CCD4-1 <sub>pro</sub> F | AGCGAACAAGTGTGTACTGTCA      |
| CCD4-1 <sub>pro</sub> R | GTAGAAAGGAAAGTAGAAGAGAAAGCA |

Supplemental Table S2 CDS sequence of LbCCOs from *L. barbarum*

| Gene name       | CDS sequence                                                                                                                                                                                                                                                                                                                                                                                                                                                                                                                                                                                                                                                                                                                                                                                                                                                                                                                                                                                                                                                                                                                                                                                                                                                                                                                                                                                                                                                                                                                                                                                                                                                                                                                                                                                                                                                                                                            |
|-----------------|-------------------------------------------------------------------------------------------------------------------------------------------------------------------------------------------------------------------------------------------------------------------------------------------------------------------------------------------------------------------------------------------------------------------------------------------------------------------------------------------------------------------------------------------------------------------------------------------------------------------------------------------------------------------------------------------------------------------------------------------------------------------------------------------------------------------------------------------------------------------------------------------------------------------------------------------------------------------------------------------------------------------------------------------------------------------------------------------------------------------------------------------------------------------------------------------------------------------------------------------------------------------------------------------------------------------------------------------------------------------------------------------------------------------------------------------------------------------------------------------------------------------------------------------------------------------------------------------------------------------------------------------------------------------------------------------------------------------------------------------------------------------------------------------------------------------------------------------------------------------------------------------------------------------------|
| <i>LbCCD4-1</i> | ATGGATGCTTTCTCTTCTACGTTCCCTTTCTACATTATCACAAACAC<br>CCTAAATCTCTTCTTTCTCCTTATAATTATTCTCCCAATTCACCA<br>TCTTCTCCTACTCTAAAAGTTTCCCTCCGTTAGAATTGAAGAAA<br>GGCCACAAACTACCACTACTAGAACAAAACCACAAGAGAAGC<br>CAACCCCTTCACCACCAAAAACCAACTCCAAAAAGAGAATTAC<br>CTATAAAACCAATACCCTCAAGAAAACCTCTAGAACCATCATT<br>TCCCTCCGTTATTTTCAATGCATTTGACGATTTTCGTAAATACTTT<br>CATTGATCCTCCTTTGAGATCTTCTGTTGATCCAAGGTATGTTT<br>TCTCTGACAATTTTCGCTCCAGTGGACGAGCTTCCTCCTACTGA<br>ATGCGAAGTAGTGGAAGGCTCCCTTCCACCTTGCCTGGACGG<br>CGCGTACATCCGAAATGGCCCTAACCCTCAATATCTTCCACGTG<br>GACCTTACCATCTTTTTGACGGAGACGGAATGCTTCACTCTATT<br>AGAATTTCTCAAGGCAAAGCTACACTCTGCAGCCGATACGTTA<br>AAACCTTACAAGTACACCATTGAACGTGATGCCGGTTCTCCGGT<br>TATCCCTAATGTGTTCTCCGGTTTCAACGGTCTAACAGCCTCGG<br>CCGCGCGTGGTGCTATTACCGCGGCTCGAGCAATTGCAGGACA<br>ATTCAATCCCACAAATGGTATAGGCCTAGCAAACACAAGCTTG<br>GCTTTATTCGGGGGTAAACTTTTCGCTATTGGTGAATCTGATTT<br>ACCATATGCAATAAAAATAGCCCCAGATGGTGATATTATTACCC<br>TCGGCCGTCACGACTTTGACGGAAATCTTTTCATGAGCATGAC<br>AGCACATCCCAAAATCGACCCAGAACTAACGAGGCTTTTGC<br>TTTCCGTTATGGCCCGATGCCTCCGTTTTTAACTTACTTTTCGTAT<br>CCAACCAAACGGTACGAAAACCCCGGACGTGCCAATATTCTC<br>CATGACACGTCCGTCATTTCTTCATGATTTTGTCAATCACGAAGA<br>AATACGCCATATTTTCGGACATACAAATAGGAATGAACCCAATT<br>GAGTTAATCAGGGGTGGTTTACCCGTGGGTGCTGACTCGGGG<br>AAAATCCCCCGACTTGGCGTAATTCCACGTTACGCCAAGGACG<br>AGTCGAAAATGAGGTGGTTTGTATGTGCCAGGGTTTAATATTGT<br>ACACGCGATAAACGCGTGGGATGAGGACGGTGGTGATACGAT<br>AGTGTTGCTGGCACCGAATATATTATCGGTGGAACATACACTAG<br>AGAGAATGGATATGATACATGCATGTGTTGAGAAAGTGAAGAT<br>AGATTTGAAGACAGGAATGGTGAGCAGACATCCTGTTTCTACC<br>AGGAATCTTGACTTTGGAGTCATCAATCCTGCTTATGTTGGGA<br>AGAATAACAAGTATGTATATGCAGCCATTGGGGACCCTATGCC<br>AAAGGTAACAGGGGTAGCAAATTAGACGTATCCGTAGCAGA<br>AACAGATCGTCGCGATTGCATAGTGGCATGCCGACTATTTGGA<br>GAAGGCTGCTTCGGTGGTGAGCCATTTTTTGTGGCTAAAGATG<br>CAAACAATCCTGATGCTGATGAAGATGATGGCTACGTAGTGTC<br>ATATGTGCACAATGAGAAGACAGGGGAATCAAGATTTTTTGGTC |

---

ATGGATGCAAAGTCCCCTAATCTTGACATTGTGGCTGCTGTCA  
AATTGCCTCATCGTGTGCCTTATGGTTTTTCACGGGCTTTTCGTA  
CGGGAAAGTGATCTTAATAAGCTGTAG

---

*LbCCD3-1*

ATGGAATTCCCTATCATCAATGAAAAGTTCATTGGATCTAGAAA  
TAAATTTGCCTATCTACAAGTTGTTGAGTTGGCAGAGGTGTCT  
GGCTCAGGATATACGAGATTTGGAGGGGCTAGCCAAGCTTCATT  
TTGAAGAAAAGAAAATCTCTACGGATGAAGAAGATGAATTGA  
TTAAAGCTGAATATCACATGTTCCCAAAGAATACATTTTGTCT  
GGAGCTTCCTTTGTTCAAAAACCTGGAGGCATCGATGAAGAC  
GATGGTTGGATCATGACATATACGCATAACGAAAATGAAAATAT  
TTCTCAAGGTGCCATATGGATTTTCATGGAGCTTTCATGCCATTA  
GAGTCTTAAGACTGTTGGTAATGGCCTTTTGTAGTTACACATTT  
AAAGTAAATTGCTCTTTTCAAAGGCCTTCAATTCCAACCAACG  
TTAAGGACTTGAAAGGCTCAATTTCCCTCTGTTTTGAAGCCACC  
ATCGAGGGGACTTGGTGCATTTTCCAATTGTTGTTGACTTTCCA  
AAGGCTGTGAAGGAGACTTCTTTCAAATTATTAGATGCCTTTG  
TGGCCTTTTTTATTTGAATTTGTTGACCAGCCATTACTCCCATCT  
CAGAGTAATTTTGCACCAGTGGAAGAGATTGGAGAAGCTGTC  
CAAGTAAGTACAGTTCAAGGGAAAATTCCAGATGATTTTCCGG  
AGGGTGTTTACATAAGAAATGGCTCAAATCCTCTGTTTGGAGG  
ACTCAAATCGACCAAGTCCATATTTGGGAAATCAAGCCACGTA  
TGGATTGAAGGAGAAGGAATGCTTCATGCTATATACTTCACTA  
GAGAAAAAAGAAGAGGGGACTTGGAATATCTTCTACAATAACA  
AACACGTCCAAACAGACACTTTCAAGATGGAAATACATAGAA  
AGAGACCTGGCTTTCTTCCTGCTATTGAAGGAGATTCTCCTGC  
CATTTTACTGGCTTACATTTTGAATGGGTTGAGATTTGGCATGA  
CAAACAAATATCTAAGCAATACAAATATCTTTGAGCACTCAA  
GAAATACTACTCTATTGCTGAAAATCATTTGCCTCAAGAGATAG  
ACATACATTCCCTTGAAACTCTGGGTAATTGGAATGTCAGTGG  
AGCTTGGAATCGACCATTACGAGTCATCCAAAGAAAGCCCC  
TGGAACCTGGTGTACTTGTTATAATGGGGATATATCCAAGAAAA  
CCTTATTTTGAAGCTAGGAGTCATTTAGCTGATGGCAAGAAAA  
TGGTTCACAAGGTGGATCTTAAGTTCAATAGGTGCAGCCTATC  
CCATGACATAGGAGTTACAGAAAGGTACAATGTGATCATGGAT  
TTTCCACTAACTATTGATATGATTCGACTTTTTAGAGGAGAATC  
ATTAATAAAGTATGATAAAGATGGGTATGCGCGGATTGGAGTAA  
TGCCTCGCTATGGTGATGCTAATTCCATTAAATGGTTTGAAGACAA  
TGATGAGGTGGTAGTAAGAGGATGCAGAGCTCTTGAATCAGTA  
TTACCAAGACCTAGTTCCAAAGTAAACAAATTTGAGAGATCTT  
TTGAAGGGTCTAAAGCGACAAGTTCCATAGAAAACAATAATGC  
GAAAGAAGAACCGTTCTTTTCATCATGTTTGTGAATGGACACTA  
AACATGAGAACAGGGGAAGTAAAGGAGAAAAATGTGACAAC  
TAAGTTCTCTTTGGAATTCCTATGATCAATGAAAAGTTCATTG  
GTCTAAGAAACAAATTTGGTTATCTACAAGTGGTAGATTTAGA  
AGCTAGCTCTATTTCAGAAGGATTAGCCAAATATGGAGGGCTT  
GCCAAACTTCATTTTAAAGAAGATGAGGAATTGATTAAAGCTG

---

---

AGTATCATATGTTCCCAGAGGGTACTTTTTGCAGTGGAGCAAC  
CTTTGTTCAAAAAATTCAAAGTGCTGATGAAGATGATGGCTGG  
GTTGTGACATTACACACAATGAAAATACAAATGTATCTCAGG  
TATATGTAGTTGATGCAAAGAGTTTTGCAAACAACCTGTTGC  
CACAATCACATTACCAAGTAGAGTGCCCTATGGATTTTCATGGA  
GCTTTCATGCCTAGCGATCAAGGTCATAA

---

*LbCCD8*

ATGGCTTCTTTTGCTTCTTCAGCAACCAAAATTTACTATACTAA  
AAACAGGTTTGATCATGGCAAAGATGATCAACCTTATTTTGGA  
AAGGTGAAAATCAatgaaaaaacaagaaaaatctGGACTTGAAATTGGT  
TACAAACGTTGCCGCCAGCCAATTGCCTGTGATTGTTCCACCA  
CCAGACCAACAGGTGATTAAGGAGGAGAAGAAGCTCGCAGC  
ATGGATTAGCGTCCGCCAAGAAAGATGGGAAGGAGAGCTCAT  
CGTTGAAGGCGAGTTACCATTGTGGCTGAATGGCACGTACCTG  
AGAAATGGTCCAGGACAATGGCACATAGGGAACCTACAATTTCC  
GGCACCTATTTGACGGCTACGCCACCTTAGTCCGACTTCACTT  
CGAAAACGGACGGCTAATAATGGGTTCACAGGCAAATCGAATC  
CGAGGCATATAAAGCAGCAAAAACCAGTAACAAAATATGTTAC  
CGAGAATTTTCAGAAGTACCTAAGCCAGACAATTTCTTATCATA  
CATTGGTGACATGGCAAACTACTCTCCGGTGCTTCCTTAACC  
GATAACGCGAATACTGGAGTCGTTAAGCTCGGTGATGGCCGAG  
TAGTTTGCCTAACGGAGACCATAAAAGGGTCAATAGTGATCGA  
TCCAGACACACTCGACACGTTAGGGAAATTCGAGTTTAGTGA  
CTCGTTAGGCGGGTTAATTCATTCAGCTCATCCAATTGTTACGG  
ATAGGGAATTGTTGACATTGATACCAGATTTGATTTACAATGGA  
TATGTAGTGGTGAGAATGGAAAAAGGAAGTAATGAGAGGAAG  
TTTATAGGGAGAGTGAATTGTAGAGGAGGACCAGCACCAGGT  
TGGGTCCATTCGTTTCCAGTAACGGAACATTATATTATTGTGCC  
GGAGATGCCGCTAAGGTATTGTGCACAAAATTTGTTAAAGGCT  
GAGCCCACACCACTATACAAGTTTGAGTGGCACCCCTCATTCCA  
AAGGCTTCATGCATGTTGTGTGTAAAGCTAGTGGCAACATTGT  
GGCAAGTGTGGAAGTGCCATTATTCGTGACATTCCACTTCATC  
AATGCATACGAGGAAAAAGACGAAGATGGTAGAGTTACTGCT  
GTTATTGCAGATTGCTGTGAACATAGCGCCGATACCACTATCCT  
TGACAAGCTCCGTCTTGAGAATCTCCGCTCCTTCAACGGCAAG  
GACGACGTCTTGCCGGATGCAAGGGTTGGGAGATTCAGAATA  
CCATTAGATGGGAGTCCATATGGAGAAGTAGAAGCAGCATTGG  
ACCCAAATGAACATGGAAGAGGCATGGATATGTGTAGCATGAA  
TCCTGCTTATTTAGGCAAGAAATACAGATATGCTTATGCTTGTG  
GTGCTAAGAGGCCTTGTAATTTCCCAAACACCCTCACTAAGAT  
TGACTTGTTTGATAAAAAGGCAAAGAATTGGTATGACGAAGGT  
GCGGTGCCTTCTGAACCCTTTTTTGTGGCTCGACCTGGTGCAA  
CCGAGGAAGATGATGGAGTTGTAATCTCAATGATCAGTGACAA  
AAATGGAGAAGGATATGCTCTAATACTGGATGGATCAACATTT  
GAAGAAATTGCAAGAGCAAAATTTCTTATGGTCTTCCCTATG  
GGCTGCACGGTTGTTGGGTTCCAAAGAAATAG

---

*LbNCED6-1*

ATGTCTTTCTCATCTTCCACCGTGCAAACCATCAAACCCCAcAa  
ttctccttcttttcttgcAAAATTCTCATCAATCCTACTAAGAAAAACACT

---

---

AGTAGAACTCTTCCTATTAGACAATTTCCACCACTTGTACCACC  
CTTACCATCAACTTCACCTTTGGTTGAACCAAAAATCTTTCCAT  
TAAAAATTGAGCCACCAAAATTGAACCCTTTACAAAAACTTGC  
TTCTTCCACCTTGGACATGTTAGAAAAATCAGTTGTAACAAAG  
TTGGAAAAAAAACACAAGCTGAACCCGACAGTCGACCCGGA  
AATTCAACTAGAAGGGAATTTTGCACCGGTTCAAGAAAACCC  
GGTTCAGCACGGTCTAGAAGTCGTTGGTCAAATTCCATCTACT  
TTAAACGGTGTCTACGTTAGAAATGGTGCTAATCCATTATTTGA  
ACCAATTAATGGCCATCATTTATTTGATGGTGATGGTATGATTCA  
TGCTGTTAACCTTGGATTCAAGTAATAATAAAGCTAGTTATTCTT  
GCCGGTTCACCTCGAACCAGCCGGTTGGTTCAAGAAGCTGCAA  
TTGGCCGACCGGTTTTTCCTAAACCGATCGGCGAATTGCATGG  
CCATTTAGGCTTAGCTAGGCTCGCGCTTTTTTTTTGCGCGAGCCA  
GTTTTGGTTTGGTTGATGCAACCAAAGGAATCGGTGTAGCTAA  
CGCCGGTTTGGTTTATTTTAACGGCAAACCTTTTAGCTATGTCTG  
AAGATGATCTTCCTTATAGAGTTCGAGTTACAGCTGATGGTGAT  
CTAGAACTGATGGACGTTATAATTTTGACGGACAGATCGATG  
ATCCATTAATAGCACATCCTAAAGTGGACCCCGTTAGAGGGGA  
ACTATATACCTTGAGTTATAATATATTGAAAAAACCTTTCCTTAA  
ATTCTTCAAGTTTGACACGTGCGGTAATAAGTCACGTGACATT  
TCTATTTCCCTCCAAGATCCATCCATGATCCATGACTTTGCCATC  
ACGGAAAATAACGTGATAATTCCAGATTATCAGGTTGTATTCAA  
GTTATCCGAGATGTTACGGGGCGGGTCACCCGTAATCCACGAC  
CCGAATAGGATTTCTAGGTTTCGGTGTGTTGTCGAAAGACGACC  
ACGATGAATCAAGAATTTCGATGGATTGACGTTCCCAATTGCTT  
TTGCATGCATTTGTGGAACGCGTGAGGAGAAAAATGAGGA  
CTACGATGAAACCATTTGTGATTATAGGGTCGTGTATGAGTCCAC  
CGGAGTCTATTTTTTTCAGGGAGTGATGAACACTTAAAAAGTGA  
ACTATCTGAGATTCGATTAACTTGAGAACTGGTGAATCAACT  
CGACGAGTTATAGTATCAGGGATGAACCTAGAAGCAGGACAA  
GTCAATAAGAATAAACTTGGTCGAAAAACTAGATATGCCTTCA  
TGGCCATAGCCGAACCGTGGCCAAAATGTAGTGGCCTAGCGA  
AAGTCGATTTGGTTCACGGGAAATGTCACGAAATTTTTTATACGG  
AGATGAAAGATTTGGGGGGGAACCCTATTTTCGTGCCAAGCaaga  
aagaaggagaagaagatgaAGGGTACATTATGAGCCATGTTAGAGATGA  
CAGGAAAGAAGAGTCTGAATTAGTTATACTTACTGCTGCAAAT  
ATGAAGCAAGTGGCCTCAGTAAAAATACCTACAAGAGTGCCAT  
ATGGGTTTCATGGTACATTTCGTTAGTTCACAAGATTTATGTAAT  
CAATCTTCTTCTTGTTAA

*LbNCED6-2*

---

ATGTTAGAAAAATCAGTTGTAACAAAGTTGGAAAAAAAACAC  
AAGCTGAACCCGACAGTCGACCCGGAAATTCAACTAGAAGGG  
AATTTTGCACCGGTTCAAGAAAACCCGGTTCAGCACGGTCTT  
GAAGTAGTTGGTCAAATTCCATCTACTTTAAATGGTGTCTACGT  
TAGAAATGGTGCTAATCCATTATTTGAACCAATTAATCGCCATC  
ATTTATTTGATGGTGATGGTATGATTCATGCTGTAAATTGGATT  
CAAGTAATAATAAAGCTAGTTATTCTTGCCGGTTCACCTCGAACC  
AGCCGGTTGGTTCAAGAAGCTGCAATTGGCCGACCGGTTTTTC

---

---

CTAAACCGATCGGCGAATTGCATGGCCATTTAGGCTTAGCTAG  
GCTGGCACTTTTTTTCGCGCGAGCCAGTTTTGGTTTGGTTGAT  
GCAACCAAAGGAATCGGTGTAGCTAACGCCGGTTTGATTTATT  
TTAACGACAAACTTTTAGCTATGTCTGAAGATGATCTTCCGTAT  
AGTGTTCAAGTTACAGCTGATGGTGATCTAGAACTGATGGAC  
GTTACAATTTTGATGGACAAATTGATGATCCATTAATAGCACAT  
CCTAAAGTGGACCCTGTTACAGGGGAACTATATACCTTGAGTT  
ATAATATATTGAAAAAACCTTTCCTTAAATTCTTCAAATTTGAC  
ACCTGCGGTAATAAGTCACGTGACATTTCTATTTCCCTCCAAGA  
TCCATCCATGGTCCATGACTTTGCCATCACGGAAAATAACGTG  
ATAATTCCAGATTATCAGGTTGTATTCAAGTTATCCGAGATGTT  
ACGGGGCGGGTCACCCGTAATCCACGACCCGAATAAGATTTCT  
AGGTTTCAGTGTGTTGTCGAAAGACGACCACGATGAATCAAGA  
ATTCGATGGATTGACGTTCCCAATTGCTTTTGCATGCATTTGTG  
GAACGCGTGGGAGGAGAAAAATGAGGATTACGATGAAACCAT  
TGTGATTATAGGGTCGTGTATGAGTCTACCAGAGTCTATTTTTT  
CAGGGAGTGATGAACCGTTAAAAAGTGAACCTATCTGAGATTC  
GATTAAATTTGAGAACTGGTGAATCAACTCGACGAGTTATAGT  
ATCAGGGATGAACCTAGAAGCAGGACAAGTCAACACGAATAA  
ACTTGGTCGAAAAACTAAGTATGCATTCATGGCCATAGCCGAA  
CCATGGCCAAAATGTAGTGGCCTAGCGAAAGTCGATTTGGTCA  
CGGGAAATGTCACGAAATTTTTATACGGAGATGAGAGATTTCGG  
GGGCGAACCCTATTTTCGTGCCAAGCaagaaagaaggagaagaagatgaAG  
GGTACATTATGTGCCATGTTAGAGATGACAGGAGAGAGGAGTC  
TGAATTAGTTATAGTTAATGCTGCAACTATGAAGCAAGTGGCCT  
CAGTAAAAATACCTACAAGAGTGCCATATGGGTTTCATGGTAC  
ATTCGTTAGTTCACAAGATTTATGTAATCAATCTTCTTGTTGTTA  
A

---

*LbCCD3-2*

ATGGCTGCTTGTATTTATGCATGTCAAATTAATTGCCGTTTCGCA  
AAAGCCTATTATTATACCCAAATGTAAGGACTTGAGAGCCTCA  
GTTTCGTCTACTTTGAAGCCATTTTTGACAAATTTAGAGCATTT  
TCCCTTGATAGTGGATGTTCCAAAAGTTATGAAGGAAACAGCT  
TTCAAATTATTGGATACTTTTGTAGATTTGACCTTTGAATTTGTT  
GACCAACCTTTGTCCCCATCTCAGAGTAATTTTGCACCTGTTG  
ATGAGATTGGAGAAGCTGTGAGAGTAACCGCAATGGAAGGGA  
AAATTCCAATGATTTTCCAGAGGGGTGTTTACGTAAGAAACGG  
ATCAAACCCTCTTTATGGAGGATTTAAATCAACCAAGtcaatttttga  
aatcaagccaTCTGTGGATTGAAGGTGAAGGAATGCTTCATGCTCT  
GTACTtcacaaaagaaaaaggaaaaggcaGCAAATGGAATATATTATACAAG  
AACAAATATGTTCAAACAGAAACATTCAACATGGAAAAGAAT  
AGGAAGAAACCAGGTTTTCTTCCTAATATGGAAGGGGATGCTC  
TTGCTGTTTTAATGGCTTCCCTTTTAAATGTGTTGAGATATGGT  
GTATTACACAAATATCTAAGCAACACGAATGTTTTTGGAGCACTC  
AAAGAAGTATTACTCAATTGCTGAAAATCATATGCCTCAAGAG  
ATAAACATACAAACCCTAGAACTCTGGGAAATTGGACTGTCA  
ATGGAGCGTGGAGTCAACCATTACAGCCCATCCGAAGTATAC  
TAAATTAATATACTTTTACTTATGAATTATATTGTGTCTCAACA

---

---

GAAAGTTCCAGGCAGCGATGAACTTGTTATAATGGGAATTAAT  
CCACTAATAAAGCCTTATCTGGAGCTAGGAGTCATTTTCAGCTG  
ATGGAAAGCAAATGGTTCACAAGGTGGATCTCAAATTCAATAG  
GTGTATCCTTTGCCATGAAATAGGAGTTACAAAGAGGTACAAT  
GTGATTTTGGATTTTCCACTAACTATAGACATAAGCAGACTTAT  
AAGGGGAGAAGAATTAATAAAATACGATAAAGATGAATATGCA  
AGAATTGGAATAATGCTTCGTTATGGTGATGCTAATTCCATCAA  
ATGGTTTGAAGTTGAACCATGTTGTGTATTTACATAATAAATT  
GTTTTGAAGATAATGATGAGGTGGTGGTGAGGGGCATGTAGATC  
TCGTCGATCGATTATACCAAGACCGAACTAACAGTAGACGAG  
CTTGAATTGAGTCTGGACGGGTGTAACGAGACGAGTTTCAGT  
AAAAATAACGTTCAATTGTCGAAgaactttttctttttcacatTTGTGAAT  
GGAGATTAAACATGAAAACAGGAGAAGTGAAGATGAAAACCTC  
CAACTACAACCGAAGATCAGTTTGTATGGAATTTCCAATTATC  
AATGAGCACTTCATTGGTCTTAAAAACAAATTTGGTTATCTACA  
ACTTGTTGATTCAGAAGCTTTCTCTAATTACTTTGACCTCATGA  
TGACATATATCTTGAATTTAGCAAAGAATTCATCAGGAGGATTT  
GCTAAATTTGGAGGGTTAGCCAAGCTTCATTTTGAAGAAAGAG  
AAGTTGAAATTTCTAAGGATGACAAAGAAGAAGAGGATTTGA  
TTAAGGTTGAGTATCACATTTTCCCAAAGAACACTTTCTGTACT  
GGAGCTACCTTTGTTCCAAAACCTTGAAGGTGTTGATGAGGATG  
ATGGTTGGATAGTGGCATTACGCACAATGAAAATACAAATGA  
ATCTCAAGTTTATATAATTGATGCAAAAAAATTAAGGGGAG  
CCTGTTGCCATCATCACATTACCTTGTAGAGTGCCATATGGATT  
TCATGGAGCTTTTATGCCATTGAACTTATAG

---

*LbCCD1*

ATGGGGGAGAAAAAAGACGAGGGGGGTGCCAATGGAGAGGAG  
TGAggggggttggtggtggtgaaCCAAAGCCCACCAAGAAGTTTGGA  
GGAAAAGCCATTGATTGGTTAGAGAAAGTGATAGTGAAATTAA  
TGTAACAAAACCTGGGCCTTGCCATTTTCTATCTGGTAACTTTGCA  
CCGAGAGTAAATTTAATGGGGATGAAAGAAGAGAATGGAGTG  
GCAAGAATAGAGGGAGGAGTAGTGGTGGTTGATCCAAAGCCA  
AAAAAAGGAGTGGTTGCAAAGGCCATAGACTTGTTAGAATGG  
GGGATGATCAAGTTAATGAATGACTCCACCAAACCACTTCACT  
ATCTTCAAGGCAATTTTGCACCTACCCATGAAACTCCTCCTTTT  
AAAGACCTTCCTGTAAAGGCCATCTTCCGGAGTGCCTGAATG  
GCGAGTTTGTGAGGGTTGGTCCAAATCCTAAATTTGCTCCAGC  
TGCTGGATATCATTGGTTTGATGGAGATGGCATGATTCATGGCT  
TGCACATTAAAGATGGAAAAGCAACATATGTCTCACGTTTTGT  
GAGGACATCACGTCTAAAGCAAGAAGAGTTCTTTGGAGGAGC  
CAAGTTTATGAAGATTGGAGATCTTAAAGGGCTGTTCTGGGTTG  
TTCTCAGTATACATTTACATGCTCAGGCAAAAGCTGAAAATTTT  
GGACACTTCCTATGGAAATGGCACAGCTAATACAGCTATGATAT  
ATCACACGGGAAGCTTTTGGCTCTTCATGAGGATGTAGTTAA  
AGTTCTGGAGGATGGAGATCTACAAACGCTTGGCATGCTGGAT  
TACGATAAAAGGTTGCAACATTCCTTTACTGCTCACCCGAAGG  
TTGACCCAGTGACTGGGGAAATGTTTACTTTTGGATACGCGCA  
GACACCACCTTACGCTACATATAGAGTCATATCCAAGGATGGC

---

---

ATCATGGAAGATCCTGTTCCAATAACAATACCAGCAGCTGTTAT  
GATGCATGATTTTGCTATTACTGAAAATTATGCAATTATGATGGA  
TCTTCCATTGTACTTCAAGCCAAAGGAAATGGTGAAAAATAAA  
CAGCTGGCATAACAGTTTTGACCCACAAAGAAGGCTCGCTTTG  
GAGTTCTTCCACGCTACGCAAAGAATGAATCCCTAATCAAGTA  
TGAGATGAGGTTCAATATGAAGAATGGTCTAGCATCAGAGAAG  
AAACTGTCAGAGTCTGCTGTTGATTTTCCACGGGTCAACGAG  
AACTACACTGGAAGACAGTCATCAGTGAATGTAATTGATGCGA  
AAACAATGTCCGCTGAACCTGTGGCAGTTGTTGAGTTACCCAA  
TAGAGTTCCATATGGTTTCCATGCCTTTTTTGTACAGAGGTAT  
TTGTGAAGAGTGGATCAGCAAGCCAGTCCATTGACAGCATGC  
AACTCTATTCTCAGTTGTCATCATCAATTCTAAAAGAAGATGAT  
GATGGAGGAGTGGTGGTTGTTAAACCAAAGCCAGGAAAGGG  
ACTAATTGCAAAGGCTGTAGACGTGTTGGAATGGGGAATAGTC  
AAGTTAATGCACGATGCATCCAAACCACTTCACTATCTTCAAG  
GCAACTTTGCACCTACTGATGAAACTCCGCCTCTTAATGACCT  
TATTGTACAAGGCCATCTTCCTGAATGCCTTAATGGTGAATTTG  
TTAGAGTTGGTCCGAATCCAAAGTTTGCTCCGGTTGCTGGATA  
TCACTGGTTTGATGGGGATGGCATGATTCATGGCTTGCGCGTTA  
AAGATGGAAAAGCAACGTATGTCTCACGTTATGTGAGGACTTC  
ACGTCTAAAGCAAGAAGAGTTCTTTGGTGGAGCTAAGTTTATG  
AAGATTGGAGATCTTAAAGGGCTGTTTGGTCTGTTACAGTTT  
ATATGCAAATGCTCAGAACAAAGCTGAAAGTATTGGACACTTC  
CTATGGAAATGGCACAGATGCACTAAAAGTTCTGGAGGATGG  
AGATCTTCAAACACTTGGCATGCTGGATTATGACAAAAGATTG  
GCACATTCCTTCACTGCCCATCCAAAAGTTGATCCTGTAACCG  
GTGAGATGTTTACCTTTGGCTACTCTCACACCCACCGTACATC  
ACTTATAGGGTTATATCAAAGGATGGAATTATGCAGGACCCGGT  
CCCAATAACAATACCAGAGGCTATCATGATGCATGATTTTGCTA  
TTACTGAAAATTATGCAATTATGATGGATCTTCCTTTGTGTTTTC  
GTCCGAAGGAAATGGTGAAAAACAATAAGCTGGCTTTTACCTT  
CGATGGTACTAAAAAGGCTCGATTTGGAGTCCTTGCACGATAT  
GCAAACAATGAGGCCCTAATCAAGTGGTTCGAGCTTCCTAATT  
GCTTCATATTTCAACGCCAATGCTTGGGAGGAGGGAGATGA  
AGTCGTGCTGATCACCTGCCGCGTTCAGAATCCAGACCTAGAC  
ATGGTCAATGGAGGCGTTAAAGAAAACCTTGAGAATTTCTGCA  
ATGAACTATATGAAATGAGATTCAACATGAAGAGTGGTGCAGC  
TTCACAGAAGAACTATCGGAGTCTGCTGTTGATTTTCCAAGG  
ATCAACGAGAGCTACACTGGCAGAAAGTCAGCTGTGAATGTA  
CTTGATGCTAAAACAATGTCCACGGAGCCTGTGGCAGTTGTTG  
AATTACCAAAAAGAGTTCCTTATGGATTCCATGCTTTCTTTGTC  
ACAGAGGgaacaaattcaagaacaagcCAAGCTGTGA

---

*LbCCD7*

ATGCAGGCCAAAGCTTGccataatattattaattcctCCAAAATTCTGC  
CACCAGCAAAATTCCCGTCCACGGTGAGCCAAATAACATTACC  
CAGCCACGTACCACGTGCCATAACAATAACTACATACCAACT  
CATGAAGTTTACACACCAGAAATTGATGATACAATTACTGCCTT  
TTGGGATTATCAATTCCTTTTTGTGTCCCAACGTTTCAGAAACCA

---



---

CTGAACCTATCAACCTTCGGGTGGTGGAGGGATCCATTCCATC  
CGATTTCCCCTCGGGGACGTATTACCTCACCGGGGCCGGGCTA  
TTCGCTGATGATCACGGGTCCACAGTGCACCCTTTAGACGGGC  
ACGGTTACTTAAGGACATTTGAAATTGATGGCGGTTCGGGCCA  
GGTAAAGTTCATGGCTAGGTACATTGAGACTGAGGCTCAGGCT  
GAGGAGCGGGACCCGGTGACAGGGAAGTGGAAGTTCACTCA  
CCGGGGCCCCGTTTTTCGGTCCTGAAAGGTGGGAAGATGGTTGG  
TAATACTAAGGTGATGAAGAATGTGGCAAATACTAGTGTGTTG  
CAATGGGGTGGCAGGTTGTTTTGCTTGTGGGAAGGTGGTGAA  
CCTTATGAGATTGATTCTAAGACATTGAACACTGTTGGGAAATT  
TGAATCATCAAGAACTCTGAATTATTACCAGAAGATAAAAAA  
ATTAATGGCGATTTTTTTGGATGTTGCTGCTCAAATCTTGAAGCC  
CATATTATATGGGGTGTTC AAGATGACTCCAAAGAGATTGCTAT  
CTCATTACAAGATTGATACTCGTAGAAACAGACTTTTGATCATG  
TCATGCAACGCAGAGGATATGTTACTACCTCGGAGTAATTTTAC  
ATTCTATGAATTTGATTCCAACCTTCCAGCTGTTACAAAGCCAAG  
AATTCGAGATTCCAGATCACTTAATGATCCATGATTGGGCTTTT  
ACAGATACTCACTACATATTGTTTGGCAATCGCATCAAGCTCGA  
TATTCCTGGGTCAATGACAGCAGTATGTGGACTGTCTCCAATG  
ATATCTGCATTATCAGTAAATCCCAGCAAGCCAACATCTCCAAT  
TTATTTGCTGCCCAGATTTCCCAATAGGAAAACCTAAAGTACAA  
AGAGACTGGAAAAAACCGATAGAAGCTCCTTCACAAATGTGG  
GTATTACATGTTGGAAATGCCTTTGAAGAAATTAGTGATGACA  
ATGGAAATGTAAACATACAAATTCAGGCTTCTGGTTGCTCTTAT  
GAGTGGTTCAATTTCCAGAAAATGTTTCGGCTATGATTGGCAAA  
GTGGTAAACTTGATCCTG CcatgatgaatgtagaagaaggagaagaaagCTAT  
TGCCTCACTTAGTTCAGGTATCTATAAACTTGGATGCAAATGGG  
AATTGCACGAAATGTTTCAGTAAATGACCTAAATCCTCAATGGA  
ACAAAGCTGCAGATTTCCCTGCCATGAATCCAGATTTTTTCTGG  
AAAGAAAAATGAATATGTTTATGCAGCAACTTCTTCTGGTTATC  
GCCAAGCATTGCCACATTTTCCCTTTGACACAGTTGTGAAACT  
AAACACTGCTGATAAATCAGTCCAAAAGTGGTCAGCTGGTAG  
AAGGAGATTCATTGGTGAACCTGTTTTTATCCCAAAGGAACT  
AGAGAAGATGATGGATACCTACTTGTAGTTGAATATGCAGTGT  
CAACACAAAGGTGCTATCTTGTAATTTTGGATGCACAAAGAAT  
TGGAGAGAAGAATGAAGTGGTTGCAAGACTTGAAGTCCCAAG  
ACATTTGAATTTCCCACTTGGTTTTTCATGGCTTTTGGGCTCCTA  
ATAACTCTGGACAAGGCAATTTACAAAATTTTAAATCCAAATG  
TAAAGATTCTTGGTCAGTGCTGGAGGATAGCAATATGGTTAATA  
TTGGGAACTGA

*LbNCED2*

---

ATGAAAAACCTCACAAGAAAACTAAAATCAATTCTGCTCTGC  
TCACTTTCCCAAACAAACTAATCCAAACCAAACAGTTCCCAC  
AAAACATTCACAACTCAGCGTCAAAGCAAGCCAACGTCTAA  
CTGGAATATCTTCCAGAAGGCAGCAGCAAAAGCACTAGATATA  
GTGGAAAGCGCGTTAGTCTCACGCGAACTCCAAAACCCACTT  
CCTAAAACCGCTGATCCACGTGTCCAAATATCCGGTAATTTTCGC  
TCCGGTACCGGAACAACCCGTCAGGCATAATCTCCCTGTTACG

---

---

GGCACAATCCCTGATTGCATTAATGGGGTTTATGTCCGTAATGG  
TGCTAACCCGCTATTTGAGCCGGTTGCAGGACATCACCTTTTC  
GACGGTGATGGCATGGTTCATGCCGTCACCGTCGAAAATGGTT  
TAGTAAGCTATTCTTGTCGTTTCACTGAAACGACAAGATTAGTT  
CAAGAACGTGAATTGGGTAAACCTGTTTTTCCAAAAGCTATTG  
GTGAACTTCATGGTCATTCTGGAATTGCTAGACTAATGCTTTTC  
TATGCTCGTGGACTTTTCGGGCTTGTTGATCATAGCAAAGGAA  
CTGGTGTGCTAATGCTGGATTAGTTTACTTTAATAATCGGCTT  
TTAGCAATGTCTGAAGATGATGTTCCCTTATCAGGTTCAAGTTTT  
GCCTTCAGGCGATTTAGAACTGTTGGAAGGTACGATTTTGCT  
GAGCAATTGAAGAGCACAAATGATTGCTCACCCGAAAATCGATC  
CTGTTTTCGGGTGAGCTTTTTGCTTTGAGCTACGACGTAGTTCA  
AAAGCCTTACTTGAAGTCATTCAGGTTTTCAACAGACGGGAA  
GAAATCACCTGATGTTGAAATCCCGTTGGATGTCCCCACCATG  
ATGCATGATTTTGCTATTACCGAGAATTACGTCGTAATTCCTGA  
CCAGCAAGTTGTGTTCAAGCTTCAAGAAATGATCAAAGGTGG  
TTCCCCGGTGATTTACGACAAAAACAAAAAATCCAGGTTTGG  
AATTCTACCCAAAAATGCTAATGATTCTGAGAATATTATTTGGG  
TAGAATCTCCAGAAACATTCTGTTTTTCATTTATGGAATGCTTGG  
GAAGAACCAGAGACAGATGAAGTAGTTGTAATTGGCTCATGC  
ATGACACCACCAGATTCCATTTTTTAATGAATGTAGTGAAAATTT  
AAAGAGTGTTTTATCCGAAATAAGGCTCAATTTGAAGACCGGA  
CAGTCGACGAAACGGGAAATAATTCAATCATCAGAACAGATG  
AATTTGGAAGCTGGAATGGTTAACAAGAACAACTTGGTCGA  
AAAACGCAATATGCTTATCTTGCTATTGCAGAGCCATGGCCAA  
AAGTGTCTGGATTTGCAAAAGTAGACTTATCAACAGGGGGAAG  
TTCAAAAACATATGTATGGAGAGAGTAGATATGGAGGTGAGCC  
ATTATTTTTACCAAGAAATGTGAACGCAGAGAGAGAAGATGAT  
GGATATATTCTTGCATTTTGCCATGATGAGAAGACATGGAAATC  
AGAACTCCAAATTGTGAATGCTATGACTCTAGAATTGGAGGCC  
ACTGTTAAGCTTCCTTCAAGAGTTCCATATGGCTTTTCATGGGAC  
TTTCATTAGTTCAAAGGACTTGCAAAATCAAGTATAG

---

*LbCCD4-2*

ATGAATGCTTTCCTTCTACATTATTACCTTACCCCAAACTCT  
CCGTTCTCCCAATCGGACATCTTCCTTTTCATCAGTAAACACTA  
AAACATCTTCATATACATCTCCAAAAGCCACAGCAAAAAGTTC  
ATCAACTAAACAACATAATAAACCCCCAAGAAAACCCTTATTA  
GAACCTTCATTTCCCGAAGTTATCTTGAATGCATGTGACGATTT  
CATCGACACTTTCATTAATCCTCCTCATCATCCTTCCGTTGATCC  
AAAATATGTTCTCACTGCCAACTTTGCTCCTGTCGACGAACTT  
CCTCCAACAGAAATGCGAGGTGGTAAAAGGAAGCCTTCCACCG  
TATCTTGATGGCGCTTACATTAGAAATGGTTCAAATCCGCAATA  
TCTTCCTCGTGGACCTTTTCATCTCTTTGATGGTGATGGAATGC  
TTCCTCTACTAGAATTTCTCAAGGTAAAGCCATATTTGTAGC  
CGTTATGTCAAAACTTACAAGTACTTGCTAGAAAAAGAAGCTG  
GGTTTTCAATCATTCTTAATCTCTTCTCCGACTTTAATAGCCGTA  
TTTCCTCTGTGACTCGTGGAGCAGTGTCTATAGCTAGGACAAA  
ATTTGGTCAATTCGATCCAAGCAATGGTATTGACCTTGCAATA

---

---

CTAGCTTGGCTCTATTTGGAGGCAATTTATTTGCTCTTTGTGAA  
TCTGATCTTCCTTATGGTATAAAATTAGCCCCAAACGGTGATAT  
CATACCAATTGGTCGCCATGATTTTGTATGGAAATCTTTTTTATGA  
ATATGACAGCACATCCCAAAATTGATCCAAACACTGGCGAGGC  
TTTTGCTTTTCGTTACGGTCCAATATCtccattttaactatttttagAATTGA  
CCCTAATGGGACCAAAAAGTCGTGATGTACCAATATTTTCCATGA  
CACATCCATCTTTTGTTCATGACTTTGCCATCACAAAAAATTAT  
GCCATATTTCTGACATACAAATAGAAATGAACCCTTGTGCCCT  
CCTTACCCGTGACTCACCGGTGGGTACAACTCGAAAAAAGT  
GGCTCGCCTAAGGGTGATTCCTCATTACGCGAGGGATGAGTCA  
GAAATGAAGTGGTTCGAAGTGCCAGGGTTTAATATGATAAATG  
CAATTAATGCATGGGAAGAAGATGATGGTGATACAATAGTAGT  
GATTGCTCCGAACACAATATCAGTAGAGCACTTTGTGGAAAGA  
TTGGATTTGATCCATGCATCAATTGAAAAAGTAAAGATAGACT  
TGAAGACGAGGATGGTAAGAAGATATCCAGTGTGACGAGGA  
ATCTTGACTTGGCAAGTATCAACCCGGCTTATGTTGGGAAAAA  
GAACAAGTACGTACAGTTAATAATTTATGATTTATATTTCTTCCG  
GACCACATTCAAGAGGATGAACATTCTTTTCAATTACTCTTCAC  
TgAATTCCTCTTTCTATATTCTCTACCTTTTCATCTCTTTGATGGT  
GGTGGAATTCTTCGCTCTACTAGAATTTCTCAAGGTAAAGCCA  
TATTTTGTAGCCGTTATGTCAAAACTTACAAAAAGAATACAAG  
CTATGAATGCTTTCACTTTTTCTTCACTTCTACGTTATTACCAC  
ACCCCAAACTCTCCGTTCTCCCAATCGGACATCTTCCTTTTC  
AGTAAACCCTAAAACATCTTCATATACATCTCCAAAAGCCACA  
GCAAAAAGTTCATCATCTAAACAACATAATAAACCCCCAAGAA  
AACCCCTTATTAGAACCTTCATTTCCCGAAGTTATCTTGAATGCA  
TGTGACGATTTTCATCGACACTTTCATTAATCCTCCTCGTCATCC  
TTCCATTGATCCAAAATATGTTCTCACTAACAACCTTTGCTCCTG  
TGGACGAACTTCCTCCTACAGAATGCGAGGTGGTAAAAGGAA  
GCCTTCCACCGTGTCTTGATGGCGCTTACATTAGAAATGGTTC  
AAATCCACAATATCTTCCTCGTGGACCTTTTCATCTCTTTGATG  
GTGATGGGATGCTTCACTCTACTAGAATTTCTCAAGGTAAAGC  
CATATTTTGTAGCCGTTATGTCAAAACTTACAAGTACATGGTAG  
AAAAAGAAGCGGGGTTTTCAATCATTCTTAATCTCTTCTCCGA  
CTTTAATAGCCTTATGGCCTCTGTGAGTCGTGGAGCAGTGTCTA  
TAGCTCGGACAAATCTTGGACAATTCGATCCAAGCAATGGTAT  
TGGCCTTGCTAACACTAGTTTGGCTCTATTGGGAGGCAATTTAT  
TTGCTCTTTATGAAACTGATCTTCCTTATGCTATAAAATTAGCCC  
CAAATGGTGATATCATAACTATTGGCCGTCATGATTTTGTATGGA  
AATCTTTCTACAAATATGACAGCACATCCCAAAATTGATCCAA  
ATACTAGTGAGGCTTTTGTCTTTTAGTTCCGGTCCAATACCTCCA  
TTTTTAACTTTTTTTAGAATTGACCCTAACGGGACTAAAAGTCG  
TGGTGTACCAATTTTCTCCATGACACGTCCCTCTTTTGTTCATG  
ACTTTGCCATTACAAAAAATTATGCCATATTTCCCGATATACAA  
ATAGAAATGAACCCTTTTAAGCCTATCATCACCGGTGGCTCAC  
CGGTGGGTTTCAACTCGAGAAAAGTGCCTCGCCTCGGGGTGA  
TTCTCGTTACGCGACAAATGAGTCAGAAATGAAGTGGTTCGA

---

---

AGTGCTAGGGTTTAATATGGTACATGCAATTAATGCGTGGGAA  
GAAGACAGCGGTGATACAATAGTAGTGATTGCTCCAAACTTAA  
TATCAGCAGAGCACCTTTCGAAAATGGATTTGATCCATGCATC  
AATTGAAAAAGTAAAGATAGACTTGAAGACGGGTACTGTAAG  
TAGAAATCCAATGTCGACGAGGAATCTTGAGTTGGCCGGTATC  
AACCCGACTTATGTTGGGAAGAAGAACAAGTACATATATGCAG  
CTATTGGAGACCCTTGGCCAAAAGCAAAAGGCGTGGTAAAAT  
TGGACGTATCCATATCAGAAATTGAACATCGTGATTGCATAGTG  
GCCACAAGAATTTTTGGACCAAACCTGTTTCTGTAGTGAGCCCT  
TTTTTGTGGAAAAGGACCCTAACAATGTATTTGCCGCCGATGA  
AGATGATGGCTATGTGGTGTGTTATATGCACAATGAGAGCACA  
AGAGAAGCAAGTTTCTTGGTGATGGATGCAAAATCTCATGATC  
TTGAAATTGTGGCTGTTGTGAAATTGCCTCGTCGTGTGCCTTAT  
GGTTTTCATGGGATATTCGTGAAGGAAAGTGATCTTAACATGC  
TATAG

---

*LbCCD4-3*

ATGCTTTCACTTTTTCCTTCACTTCCACATTATTACCACACCCC  
AAAACCTCTTCTCTCCTAATCGGACATCTCCTTTTTTCATCAGTAA  
ACCCTAAAACATCTTCATATACATCTCCAAAAGCCACAGCAAA  
AAGTCCATCATCTAAACAACATGATAAACCCCCAAGAAAACCC  
TTATTAGAACCTTCATTTCTCGAAGTTAGCTTGAATGCATGTGA  
GGATTTTCATCGACACTTTCATTAATCCTCTTCATCATCCTTCCGT  
TGATCCAAAATGTGTTCTCGCTGACAACTTTGCTCCTGTGGAC  
GAACTTCCTCCGACAGAATGCGAGGTGGTAAAAGGAAAACCTT  
CCACCGTGTCTCGACGGCGCTTACATTAGAAATGGGCCAAATC  
CACAATATCTTCCTCGTGGACCTTTTCATCTCTTTGATGGTGAT  
GGAATGCTTCACTCTACTAGAATTTCTCAAGGAAAAGCAATAT  
TTTGTAGCCGTTATGTTCAAACCTTACAAGTACTTGGTAGATAAA  
GAAGCTAGGTTTTTCGGTCGTTCCCTAATCCCTTCTCCGACTTTAA  
TGGCCTTATGGCCTCTGTGAGTCGTGGAGCAGTGTCTATAGCT  
CGGACAATTCTTGGACAGTTCGATCCACGCAATGGTATTGGCC  
GTGCTAACACTAGTTTGGCTCTATTTGGAGGCAATTTATTTGCT  
CTTTATGAAGCTGATCTTCCTTATGCTATAAACTAGCCCCAGA  
TGGTGATATCATAACTATTGGTCGTCATGATTTTGATGGAAATCT  
TTCTACAACTATGACAGCACATCCCAAATGATCCAAACACC  
AATGAGGCTTTTGCTCTTCGTTACGGTCCAATACCtccatttttaacttatt  
ttagAATTGACCCTAACGGGACCAAAAGTCGTGGCGTACCAATT  
TTCTCCATGACACGTCCATCTTTTGTTCATGACTTTGCCATTAC  
AAAAAATTATGCCATATTTCCCGACATACATATAGAAGTGGGCC  
CTTTTGCATCATCACCTGTGGCTCACCGCTGGGTTCGACTC  
GAGAAAAGTGCCTCGCCTGGGGGTGATTCTCGTTACGCAAC  
GGATGAGTCAGAAATGAAGTGGTTCGAAGTACCAGGGTTTAA  
TATGATACATGCAATTAATGCATGGGAAGAAGATGACGGTGAT  
ACAATAGTAGTGATTGGTACGAATATAATATCAGTAGAGCACTT  
CTTTGAAAGATGGGATTTGATTCATACATCAATTGAAAAAGTA  
AAGATAGACTTGAAGACGGGGACAGTAAGCAGACATCCAGTG  
TCGACGAGGAATCTTGAATTGGCAGTAATCAATACGGCTTATAT  
TGGCAAGAAGAACAAGTACATATATGCAGCAATAGGAGAACC

---

---

TTGGCCAAAGGCCAAAAGGTGTGGTAAAATTGGACATATCCATA  
TCAGAAACTGATCGTCGTGATTGCATAGTGGCCACAAGAATTT  
TTGGACCAAACCTGTTTCTGTAGTGAGCCCTTCTTTGTGGCAA  
GGATCCCAACAATGTATTTGCAGCTGATGAAGATGATGGCTAT  
GTGGTGTGTTATATGCACGATGAAATACAAGAGAATCAAGTTT  
CTTGGTGA

---

ATGGCCACTTCTTCTCCTGCTACAAATACATGGATTAAACCCAA  
GATATCAATGCCATCATCAAGAGAGTTTGGTCATTCTTCAAACCT  
CTATTTCACTACTCaaaaacaagcctaataaaatCACTTGCTCTCTTCAAG  
CTCCACCTATTCTCCATTTCCCTAAACAACAATCTTCAAATTAT  
CAAACACCTAAAACCAATACCATTCCCCTTCAAACCAACCA  
CAAAAATCTCACAtccaaaacaagaaaataaatccTCCTCCTCTTCTCCTT  
GGAATTTAGTACAAAAAGCAGCAGCAATGGCTTTAGATGCTGT  
AGAAAGTGTTTTAACAAAACACGAACCTGAACACCCTTTACC  
AAAAACAGCTGATCCACGTGTCCAAATTTCCGGTAACTTCGCT  
CCGGTACCTGAAAATCCAGTCACTCAATCACTTCCGGTCACCG  
GAAAAATACCAAAATGTGTTAACGGTGTATACGTTTCGTAACGG  
AGCTAACCCTGTTATTCGAACCAACAGCTGGTCACCATTTCTTT  
GATGGTGATGGTATGGTACATGCTGTTGAATTCAAAAACGGAT  
CAGCAAGTTACGCTTGTCGTTTCACTGAAACTGAAAGATTGGT  
TCAAGAGAAAGCTTTGGGTCGACCTGTTTTTCCAAAAGCCATT  
GGTGAATTACATGGTCATTCTGGTATTGCAAGGCTTATGTTGTT  
TTATGCACGTGGTGTTTTTGGTCTTGTTGATCATAGTAACGGAA  
CTGGTGTTGCTAACGCTGGTTTTGGTTTTATTTTAATAACCGTTTA  
CTTGCTATGTCTGAAGATGATTTGCCTTACCATGTTAGGGTAAC  
GGCTAATGGTGATCTTGAAACTGATGGAAGGTTTCGATTTTCGAT  
GGGCAATTAAAATCAACAATGATAGCTCACCCGAAACTTGATC  
CTGTTTTCGGGGGAGCTTTTTGCTCTTAGTTACGATGTGATTCAG  
AAACCGTATTTGAAGTACTTCAGGTTTTCAAAAAACGGGGAG  
AAATCGAATGATGTTGAGATTCCTGTTGAAGACCCAACAATGA  
TGCATGATTTTCGCGATAACGGAGAAATTCGTTGTTATTCCTGAT  
CAACAAGTTGTGTTCAAGATGTCTGAAATGATCCGTGGAGGTT  
CACCTGTTGTTTATGACAAGAACAAGTTTCAAGATTTGGGAT  
TTTGGATAAGTATGCTAAAGATGGATCAGGTTTGAAATGGGT  
GAAGTGCCTGATTGTTTTTGTTCCTTTATGGAATGCTTGGGA  
AGAGCCGGAAACTGATGAAATTGTGGTGATTGGTTCATGTATG  
ACACCACCTGACTCAATTTTAAACGAATGTGATGAGGGATTAG  
AGAGTGTTTTATCAGAAATTCGGCTCAATTTGAAAACCTGGAAA  
ATCAACAAGAAAGGCTATTATTCAAACGAAGAAGAACAGGT  
GAATTTAGAAGCAGGAATGGTGAACAGGAACAACTTGGGAG  
AAAAACACAGTATGCATATTTGGCTATTGCAGAACCATGGCCA  
AAAGTTTCTGGTTTTTGCCAAAGTAGACCTTTTTACAGGTGAAA  
TTAACAAGTTCTTTTATGGTGACAACAAGTATGGTGGGGAGCC  
TCTTTTTTTTACCAAGAGACCCAAACAGCAAAGATGAAGATGAT  
GGTTACATTTTAGCTTTTGTGCATGATGAGAAAGAATGGAAAT  
CAGAGCTGCAAATTGTTAATGCAATGACCTTAAAGTTAGAGGC  
CACAGTGAAACTTCCATCAAGAGTCCCTTATGGTTTTTCATGGA

---

*LbNCED1*

---

ACTTTCATAAATGCCAAAGACTTGGCAAATCAGGCCTAA

---

Supplemental Table S3 Protein sequence of CCOs from *L. barbarum*, *N. tabacum*, *A. thaliana*, *S. lycopersicum*, *Crocus sativus*, and *L. ruthenicum*

| Gene name | Protein sequence                                                                                                                                                                                                                                                                                                                                                                                                                                                                                                                                                                                                                                                                                                                     |
|-----------|--------------------------------------------------------------------------------------------------------------------------------------------------------------------------------------------------------------------------------------------------------------------------------------------------------------------------------------------------------------------------------------------------------------------------------------------------------------------------------------------------------------------------------------------------------------------------------------------------------------------------------------------------------------------------------------------------------------------------------------|
| AtNCED    | MASFTATAAVSGRWLGGNHTQPPLSSSQSSDLSYCSSLPMASRVTRKL<br>NVSSALHTPPALHFPKQSSNSPAIVVKPKAKESNTKQMNLFQRAAAAA<br>LDAAEGFLVSHEKLHPLPKTADPSVQIAGNFAPVNEQPVRRNLPPVVGK<br>LPDSIKGVYVRNGANPLHEPVTGHHFFDGDGMVHAVKFEHGSASYAC<br>RFTQTNRVQERQLGRPVPFKAIGELHGHTGIARLMLFYARAAAGIVD<br>PAHGTGVANAGLVYFNGRLLAMSEDDLPHYQVQITPNGDLKTVGRFDF<br>DGQLESTMIAHPKVDPESEGELFALSVDVSKPYLKYFRFSPDGTKSPD<br>VEIQLDQPTMMHDFAITENFVVVPDQQVVFVKLPPEMIRGGSPVVYDKN<br>KVARFGILDKYAEDSSNIKWIDAPDCFCFHLWNAWEEPETDEVVVIGS<br>CMTPPDSIFNESDENLKSVLSEIRLNLKTGESTRRPIISNEDQQVNLEAG<br>MVNRNMLGRKTKFAYLALAEPWPKVSGFAKVDLTTGEVKKHLYGDN<br>RYGGEPLFLPGEGGEEDEGYILCFVHDEKTKWSELQIVNAVSLVEAT<br>VKLPSRVPHYGFHGTFIGADDLAKQVV                                                           |
| AtNCED9   | MTIITIISGMYIYSLLSQDAHHSQYGQNTNLVLKKPIPKPQTAAFNQEST<br>MASTTLLPSTSTQFLDRTFSTSSSSSRPKLQSLSFSTLRNKKLVVPCYV<br>SSSVNKKSSVSSSLQSPTEKPPSWKKLCNDVTNLIPKTTNQNPKLNPVQ<br>RTAAMVLDAVENAMISHERRRHPHPKTADPAVQIAGNFFPVPEKPVVH<br>NLPVTGTVPCEIQGVYVRNGANPLHKPVSGHHLFDGDGMVHAVRFD<br>NGSVSYACRFTETNRLVQERECGRPVPFKAIGELHGHLGIAKLMLFNT<br>RGLFGLVDPTGGLGVANAGLVYFNGHLLAMSEDDLPHYHVKTQTGD<br>LETSGRYDFDGQLKSTMIAHPKIDPETRELFALSVDVSKPYLKYFRFT<br>SDGEKSPDVEIPLDQPTMIHDFAITENFVVIPDQQVVFRLPEMIRGGSPV<br>VYDEKKKSRFGILNKNAKDASSIQWIEVPDCFCFHLWNSWEEPETDEV<br>VVIGSCMTPPDSIFNEHDETQSLSVLSEIRLNLKTGESTRRPVISEQVNLE<br>AGMVNRNLLGRKTRYAYLALTEPWPKVSGFAKVDLSTGEIRKYIYGE<br>GKYGGEPLFLPSGDGEEDGGYIMVFVHDEEKVKSELQLINAVNMKLE<br>ATVTLPSRVPHYGFHGTFIGEDLSKQALC |
| AtNCED5   | MACSYILTPNPTKLNLSFAPSDLDAPSPSSSVSFTNTKPRRRKLSANSVS<br>DTPNLLNFPNYPSPNPIPEKDTSRWNPLQRAASAALDFAETALLRRER<br>SKPLPKTVDPRHQISGNYPVPEQSVKSSLSVDGKIPDCIDGVYLRNGA<br>NPLFEPVSGHHLFDGDGMVHAVKITNGDASYSCRFTETERLVQEKQLG<br>SPIFPKAIGELHGHSIARLMLFYARGLFGLLNHKNGTGVANAGLVYF<br>HDLRLAMSEDDLPHYQVRVTDNGDLETIGRFDGQLSSAMIAHPKIDP<br>VTKELFALSVDVVKPYLKYFKFSPEGEKSPDVEIPLASPTMMHDFAIT<br>ENFVVIPDQQVVFVKLSDMFLGKSPVKYDGEKISRFGILPRNAKDASEM<br>VWVESPETFCFHLWNAWESPETDEVVVIGSCMTPADSIFNECDEQLNS<br>VLSEIRLNLKTGKSTRRTIIPGSVQMNLEAGMVNRNLLGRKTRYAYLAI<br>AEPWPKVSGFAKVDLSTGEVKNHFYGGKKYGGEPFFLPRGLESDGED<br>DGYIMSFVHDEESWESELHIVNAVTLLEATVKLPSRVPHYGFHGTFTVN<br>SADMLNQA                                                                           |

|          |                                                                                                                                                                                                                                                                                                                                                                                                                                                                                                                                                                                                                                                                                                      |
|----------|------------------------------------------------------------------------------------------------------------------------------------------------------------------------------------------------------------------------------------------------------------------------------------------------------------------------------------------------------------------------------------------------------------------------------------------------------------------------------------------------------------------------------------------------------------------------------------------------------------------------------------------------------------------------------------------------------|
| AtNCED6  | <p>MQHSLRSDLLPTKTSRSHLLPQPKNANISRRILINPFKIPTLPDLTSPVP<br/> SPVKLKPTYPNLNLQKLAATMLDKIESSVIPMEQNRPLPKPTDPAVQ<br/> LSGNFAPVNECPVQNGLEVVGQIPSCCLKGVYIRNGANPMFPPLAGHHL<br/> FDGDGMIHAVSIGFDNQVSYSCRYTKTNRLVQETALGRSVFPKPIGELH<br/> GHSGLARLALFTARAGIGLVDGTRGMGVANAGVVFFNGRLLAMSED<br/> DLPYQVKIDGQGDLLETIGRFGFDDQIDSSVIAHPKVDATTGDLHTLSYN<br/> VLKKPHLRYLKFNTECGKKTRDVEITLPEPTMIHDFAITENFVVIPDQQM<br/> VFKLSEMIRGGSPVIYVKEKMARFGVLSKQDLTGSDINWVDVPDCFCF<br/> HLWNAWEERTEEGDPVIVVIGSCMSPPDTIFSESGEPTRVELSEIRLNM<br/> RTKESNRKVIVTGVNLEAGHINRSYVGRKSQFVYIAIADPWPKCSGIA<br/> KVDIQNGTVSEFNYPGSRFGGEPFCFVPEGEGEEDKGYVMGFVRDEEK<br/> DESEFVVVDATDMKQVA AVLRLPERVPYGFHGTFFVSENQLKEQVF</p>                       |
| AtNCED3  | <p>MASFTATAAVSGRWLGGNHTQPPLSSSQSSDLSYCSSLP MASRVTRKL<br/> NVSSALHTPPALHFPKQSSNSPAIVVKPKAKESNTKQMNLFQRAAAAA<br/> LDAAEGFLVSHEKLHPLPKTADPSVQIAGNFAPVNEQPVRRLNPVVGK<br/> LPDSIKGVYVRNGANPLHEPVTGHHFFDGDGMVHAVKFEHGSASYAC<br/> RFTQTNRVQERQLGRPVPFKAIGELHGHTGIARLMLFYARAAAGIVD<br/> PAHGTGVANAGLVYFNGRLLAMSEDDLPYQVQITPNGDLKTVGRFDF<br/> DGQLESTMIAHPKVDPESEGELFALSVDVSKPYLKYFRFSPDGTKSPD<br/> VEIQLDQPTMMHDFAITENFVVVPDQQVVFKLPEMIRGGSPVVYDKN<br/> KVARFGILDKYAEDSSNIKWIDAPDCFCFHLWNAWEEPETDEVVIGS<br/> CMTPPDSIFNESDENLKSVLSEIRLNLKTGESTRRPIISNEDQQVNLEAG<br/> MVNRNMLGRKTKFAYLALAEPWPKVSGFAKVDLTTEGEVKKHLYGDN<br/> RYGGEPLFLPGEGGEDEGYILCFVHDEKTKWSELQIVNAVSLVEAT<br/> VKLPSRVPYGFHGTFIGADDLAKQVV</p> |
| AtNCED2  | <p>MVSLTMPMSGGIKTWPQAQIDLGFRPIKRQPKVIKCTVQIDVTELT<br/> KRQLFTPRTTATPPQHNLRLNIFQKAAAIAIDAAERALISHEQDSPLPK<br/> TADPRVQIAGNYSVPPESSVRRNLTVEGTIPDCIDGVYIRNGANPMFEP<br/> TAGHHLFDGDGMVHAVKITNGSASYACRFTKTERLVQEKRLGRPVPF<br/> KAIGELHGHSGIARLMLFYARGLCGLINNQNGVG VANAGLVYFNNRL<br/> LAMSEDDLPYQLKITQTGDLQTVGRYDFDQGLKSAMIAHPKLDPVT<br/> ELHALSYDVVKKPYLKYFRFSPDG VKSPELEIPLETPTMIHDFAITENF<br/> VVIPDQQVVFKL GEMISGKSPV VFDGEKVSRLGIMPKDATEASQIIWV<br/> NSPETFCFHLWNAWESPETEEIVVIGSCMSPADSIFNERDESLRSVLSEI<br/> RINLRTRKTTRRSLLVNEDVNLEIGMVNRNRLGRKTRFAFLAIAYPWP<br/> KVSGFAKVDLCTGEMKKYIYGGEKYGGEPFFLPGN SGNGEENEDDGY<br/> IFCHVHDEETKTSELQIINAVNLKLEATIKLPSRVPYGFHGTFFVDSNELV<br/> DQL</p>             |
| LbCCD4-1 | <p>MDAFSSTFLSTLSQHPKSLLSPYNYSPNSPSSPTLKVSSVRIERPQTTT<br/> TRTKPQEKPTSPPKPTPKRELPIKPIPSRKPLEPSFSPVIFNAFDDFVNTF<br/> IDPPLRSSVDPRYVLSDNFAPVDELPTTECEVVEGSLPPCLDGAYIRNGP<br/> NPQYLPRGPYHLFDGDGMLHSIRISQGKATLCSRYVKTYKYTIERDAG<br/> SPVIPNVFSGFNGLTASAARGAITAARAIAAGQFNPTNGIGLANTSLALFG<br/> GKLFAIGESDLPYAIKIAPDGDII TLGRHDFDGNLFMSMTAHPKIDPETN<br/> EAFAFRYGPMPPFLTYFRIQPNGTKTPDVPIFSMTRPSFLHDFAITKKYAI<br/> FSDIQIGMNPIELIRGGSPVGADSGKIPRLGVIPRYAKDESKMRWFDVP<br/> GFNIVHAINAWDEDGGDTIVLLAPNILSVEHTLERMDMIHACVEKVKI</p>                                                                                                                                                                              |



|           |                                                                                                                                                                                                                                                                                                                                                                                                                                                                                                                                                                                                                                                                                                                                                                                                               |
|-----------|---------------------------------------------------------------------------------------------------------------------------------------------------------------------------------------------------------------------------------------------------------------------------------------------------------------------------------------------------------------------------------------------------------------------------------------------------------------------------------------------------------------------------------------------------------------------------------------------------------------------------------------------------------------------------------------------------------------------------------------------------------------------------------------------------------------|
|           | DLKTGMVSRHPVSTRNLDFGVINPAYVGKNNKYVYAAIGDPMPKVTG<br>VAKLDVSVAETDRRDCIVACRLFGEGCFGGEPPFFVAKDANNPDADDD<br>GYVVSYSVHNEKTGESRFLVMDAKSPNLDIVAAVKLPHRVPYGFHGLF<br>VRESDLNKL                                                                                                                                                                                                                                                                                                                                                                                                                                                                                                                                                                                                                                          |
| LbCCD3-1  | MEFPIINEKFIGSRNKFAYLQVVVELAEVSGSGYTRFGGLAKLHFEEKKI<br>STDEEDELIAEYHMF PKNTFCSGASFVQKPGGIDDDGWIMTYTHNE<br>NENISQGAIWISWSFHAI RVLRLLVMAFCSYTFKVNC SFQRPSIPTNVK<br>DLKGSISSVLKPPSRDLVHFPIVVD FPKAVKETSFKLLDAFVAFLFEFVD<br>QPLLPSQSNFAPVEEIGEAVQVSTVQGKIPDDFPEGVYIRNGSNPLFGG<br>LKSTKSIFGKSSHVWIEGEGMLHAIYFTREKRRGTWNIFYNNKHVQTD<br>TFKMEIHRKRPGFLPAIEGDSPAILLAYILNGLRFGMTN KYLSNTNIFEH<br>SKKYYSIAENHLPQEIDIHSLET LGNWNVSGAWNRPFTSHPKKAPGTG<br>VLVIMGIYPRKPYFELGVISADGKKMVHKVDLKFNRCSLSHDIGVTER<br>YNVIMDFPLTIDMIRLFRGESLIK YDKDGYARIGVM PRYGDANSIKWF<br>DVQPCCVFHLINCFEDNDEVVVRGCRALESVLPRPSSKVNKFERSFEG<br>SKATSSIENNNAKEEPFFHHVCEWTLNMRTGEVKEKNVTTKFSLEFPM<br>INEKFIGLRNKF GYLQVVDLEASSISEGLAKYGG LAKLHFKEDEELIKA<br>EYHMFPEGTFCSGATFVQKIQSADEDDGWVVTFTHNENTNV SQVYVV<br>DAKSFAKQP VATITLPSRV PYGFHGAFMPSDQGH |
| LbCCD8    | MASFASSATKIYYTKNRFDHGKDDQPYFGKV KINEKNKKNLDLKLVT<br>NVAASQLPVIVPPPDQQVIKEEK KLAAWISVRQERWEGELIVEGELPL<br>WLNGTYLRNGPGQWHIGNYNFRHLFDGYATLVRLHFENGRLIMGHR<br>QIESEAYKAAKTSNKICYREFSEVPKPDNFLSYIGDMAKLLSGASLTDN<br>ANTGVVKLGDGRVVCLTETIKGSIVIDPDTLDTLGKFEFSDSLGGLIHS<br>AHPIVTDRELLTLIPDLIYNGYVVVRMEKGSNERKFIGRVNCRGGPAPG<br>WVHSFPVTEHYIIVPEMPLRYCAQNLLKAEPTPLYKFEWHPHSGKGMH<br>VVCKASGNIVASVEVPLFVTFHFINAYEEKDEDGRVTAVIADCCEHSAD<br>TTILDKLRLLENLRSFNGKDDVLPDARVGRFRIPLDGSPYGELEAALDPN<br>EHGRGMDMCMNPAYLGKKYRYAYACGAKRPCNFPNTLT KIDLFDKK<br>AKNWYDEGAVPSEPFFVARPGATEEDDGVVISMISDKNGEGYALILDG<br>STFEEIARAKFPYGLPYGLHGCWVPPK                                                                                                                                                                                   |
| LbNCED6-1 | MSFSSSTVQTIKPHNSPSFCKILINPTKKNTSRTLPIRQFPPLVPPLPSTS<br>PLVEPKIFPLKIEPPKLNPLQKLASSTLDMLEKSVVTKLEKKHKLNPTV<br>DPEIQLEGNFAPVQENPVQHGLEVVVGQIPSTLNGVYVRNGANPLFEPIN<br>GHHLFDGDGMIHAVNLDSSNNKASYSCRFTRTSRLVQEAAIGRPVFPK<br>PIGELHGHLGLARLALFFARASFGLVDATKGIGVANAGLVYFNGKLLA<br>MSEDDL PYRV RVTADGDLETDGRYNFDGQIDDPLIAHPKVPDPVRGELY<br>TLSYNILKKPFLKFFKFDT CGNKSRDISISLQDPSMIHDFAITENNVIIPD<br>YQVVFKLSEMLRGGSPVIHDPNRISRFGVLSKDDHDESRIRWIDVPNCF<br>CMHLWNAWEEKNEDYDETIVIIGSCMSPPE SIFSGSDEHLKSELSEIRL<br>NLRTGESTRRVIVSGMNLEAGQVNKNKLGRKTRYAFMAIAEPWPKCS<br>GLAKVDLVTGNVTKFLYGDERFGGEPYFVPSKKEGEDEGYIMSHVR<br>DDRKEESELVILTAANMKQVASVKIPTRVPYGFHGT FVSSQDLCNQSSS<br>C                                                                                                                                              |
| LbNCED6-2 | MLEKSVVTKLEKKHKLNPTVDPEIQLEGNFAPVQENPVQHGLEVVVGQ<br>IPSTLNGVYVRNGANPLFEPINRHHLFDGDGMIHAVKLDSSNNKASY<br>CRFTRTSRLVQEAAIGRPVFPKPIGELHGHLGLARLALFFARASFGLVD                                                                                                                                                                                                                                                                                                                                                                                                                                                                                                                                                                                                                                                      |

|          |                                                                                                                                                                                                                                                                                                                                                                                                                                                                                                                                                                                                                                                                                                                                                                                                                                                                                                                                                                                                                                                                                                  |
|----------|--------------------------------------------------------------------------------------------------------------------------------------------------------------------------------------------------------------------------------------------------------------------------------------------------------------------------------------------------------------------------------------------------------------------------------------------------------------------------------------------------------------------------------------------------------------------------------------------------------------------------------------------------------------------------------------------------------------------------------------------------------------------------------------------------------------------------------------------------------------------------------------------------------------------------------------------------------------------------------------------------------------------------------------------------------------------------------------------------|
|          | <p>ATKGIGVANAGLIYFNDKLLAMSEDDL PYSVQVTADGDLET DGRYNF<br/> DGQIDDPLIAHPKVDPVTGELYT LSYNILKKPFLKFFKFDTCGNKSRDI<br/> SISLQDPSMVHDFAITENNVII PDYQVVFKLSEMLRGGSPVIHDPNKISR<br/> FSVLSKDDHDESRIRWIDVPNCFCMHLWNAWEEKNEDYDETIVIIGSC<br/> MSLPESIFSGSDEPLKSELSEIRLNLRTGESTRRVIVSGMNLEAGQVNTN<br/> KLGRKTKYAFMAIAEPWPKCSGLAKVDLVTGNVTKFLYGDERFGGEP<br/> YFVPSKKEGEDEGYIMCHVRDDRREESELVIVNAATMKQVASVKIPT<br/> RVPYGFHGT FVSSQDLCNQSSCC</p>                                                                                                                                                                                                                                                                                                                                                                                                                                                                                                                                                                                                                                                                  |
| LbCCD3-2 | <p>MAACIYACQINCRSQKPIIPKCKDLRASVSSTLKPFLT NLEHFPLIVDVP<br/> KVMKETAFKLLDTFVDLTFEFVDQPLSPSQSNFAPVDEIGEAVRVTAME<br/> GKIPNDFPEGVYVRNGSNPLYGGFKSTKSIFGKSSHLWIEGEGMLHAL<br/> YFTKEKGKGSKNILYKNKYVQTETFNMEKNRKKPGFLPNMEGDAL<br/> AVLMASLLNV LRYGVLHKYLSNTNVFEHSSKKYYSIAENHMPQEINIQT<br/> LET LGNWT VNGAWSQPFTAHPKYTKINILLMNYIVSQQKVP GSDELV<br/> IMGINPLIKPYLELGVISADGKQMVHKVDLKFNR CILCHEIGVTKRYN<br/> VILDFPLTIDISRLIRGEELIKYDKDEYARIGIM LRYGDANSIKWFEVEPC<br/> CVFHIINCFEDNDEVVVRACRSRRSII PRPKLTVDELELSLDGLNETSFS<br/> KNNVQLSKELFSFFHICEWRLNMKTGEVKMKTPTTTEDQFVMEFPIIN<br/> EHFIGLKNKFGYLQLVDSEAFS NYFDLMMTYILNLAKNSSGGFAKF GG<br/> LAKLHFEEREVEISKDDKEEDLIKVEYHIFPKNTFCTGATFVPKLEGV<br/> DEDDGWIVAFTHNENTNESQVYIIDAKKIKGEPVAIITLPCRVPYGFHG<br/> AFMPLNL</p>                                                                                                                                                                                                                                                                                                                                     |
| LbCCD1   | <p>MGEKKDEGVPMERSEGGWVVVKPKPTKKFGGKAIDWLEKVIVKLM<br/> YKTGPCHFLSGNFAPRVNLMGMKEENGVARIEGGVVVDPKPKKGV<br/> VAKAIDLLEWGMIKLMNDSTKPLHYLQGNFAPTHE TPPFKDLPVKGH<br/> LPECLNGEFVRVGP NPKFAPAAGYHWFDGDGMIHGLHIKDGKATYVS<br/> RFVRTSRLKQEEFFGGAKFMKIGDLKGLFGLFSVYIYMLRQKLKILD T<br/> SYGNGTANTAMIYHHGKLLALHEDVVKVLEDGDLQTLGMLDYDKRL<br/> QHSFTAHPKVDPVTGEMFTFGYAQT PPYATYRVISKDGMEDPVPITIPA<br/> AVMMHDFAITENYA IMMDLPLYFKPKEMVK NKQLAYSFDPTKKARFG<br/> VLPRYAKNESLIKYEMRFNMKNGLASEKKLSESAVD FPRVNENYTGR<br/> QSSVNVIDAKTMSAEPVAVVELPNRVPYGFHAF FVTEVFVKSGSASQSI<br/> DSMQLYSQLSSSILKEDDDGGVVVVVKPKPGKGLIAKAVDVLEWGIVK<br/> LMHDASKPLHYLQGNFAPTDETPPLNDLIVQGH LPECLNGEFVRVGP N<br/> PKFAPVAGYHWFDGDGMIHGLRVKD GKATYVSRYVRTSRLKQEEFFG<br/> GAKFMKIGDLKGLFGLFTVYMQMLRTKLKVLDTSYGNGTDALKVLE<br/> DGD LQTLGMLDYDKRLAHSFTAHPKVDPVTGEMFTFGYSHTPPYITY<br/> RVISKDGMQDPVPITIP EAIMMHDFAITENYA IMMDLPLCFRPKEMVK<br/> NNKLAFTFDGTTKKARFGVLARYANNEALIKWFELPNC FIFHNANAW E<br/> EGDEVVLITCRVQNPDLDMVNGGVKENLENFCNELYEMRFNMKSGA<br/> ASQKKLSESAVD FPRINESYTGRKSAVNVLDAKTMSTEPVAVVELPKR<br/> VPYGFHAF FVTEEQIQEQAKL</p> |
| LbCCD7   | <p>MQAKACHNIINIPPKLLPPAKFPSTVSQITLPSHVPRAITITTSPTHEVYT<br/> PEIDDTITAFWDYQFLFVSQRSETTEPINLRVVEGSIPSDFPSGTYYLTGP<br/> GLFADDHGSTVHPLDGHGYLRTFEIDGGSGQVKFMARYIETEAQAEER<br/> DPVTGKWKFTHRGPFSVLKGGKMVGNTKVMKNVANTSVLQWGGRL<br/> FCLWEGGEPYEIDSKTLNTV GKFELIKNSELLPEDKKINGDFLDVAAQI</p>                                                                                                                                                                                                                                                                                                                                                                                                                                                                                                                                                                                                                                                                                                                                                                                                             |

|          |                                                                                                                                                                                                                                                                                                                                                                                                                                                                                                                                                                                                                                                                                                                                                                                                                                                                                                                                                                                                                                                                                                                                                                                                                                                                                                   |
|----------|---------------------------------------------------------------------------------------------------------------------------------------------------------------------------------------------------------------------------------------------------------------------------------------------------------------------------------------------------------------------------------------------------------------------------------------------------------------------------------------------------------------------------------------------------------------------------------------------------------------------------------------------------------------------------------------------------------------------------------------------------------------------------------------------------------------------------------------------------------------------------------------------------------------------------------------------------------------------------------------------------------------------------------------------------------------------------------------------------------------------------------------------------------------------------------------------------------------------------------------------------------------------------------------------------|
|          | <p>LKPILYGVFKMTPKRLLSHYKIDTRRNRLIMSCNAEDMLLPRSNFTFY<br/> EFDSNFQLLQSQEFEIPDHLMIHDWAFTDTHYILFGNRIKLDIPGSMTAV<br/> CGLSPMISALSVNPSKPTSPIYLLPRFPNRKTKVQRDWKKPIEAPSQMW<br/> VLHVGNAFEEISDDNGNVNIQIQASGCSYEWFNQKMFGYDWQSGKL<br/> DPAMMNVEEGEEKLLPHLVQVSINLDANGNCTKCSVNDLNPQWNKA<br/> ADFPAMNPDFS GKKNEYVYAATSSGYRQALPHFPFDTVVKLNTADKS<br/> VQKWSAGRRRFIGEPVFIPKGTREDDGYLLVVEYAVSTQRCYLVILDA<br/> QRIGE KNEVVARLEVPRHLNFPLGFHGFHFWAPNNSGQGNLQNFKSKCK<br/> DSWSVLEDSNMVNIGN</p>                                                                                                                                                                                                                                                                                                                                                                                                                                                                                                                                                                                                                                                                                                                                                                                                                          |
| LbNCED2  | <p>MKNLTRKTKINSALLTFPKQTNPNQTVPTKHSQTQRQSKPTSNNWNIFQ<br/> KAAAKALDIVESALVSRELQNPLPKTADPRVQISGNFAPVPEQPVRHNL<br/> PVTGTIPDCINGVYVRNGANPLFEPVAGHHLFDGDGMVHAVTVENGL<br/> VSYSCRFTETTRLVQERELGKPVFPKAIGELHGHSGIARLMLFYARGLF<br/> GLVDHSGKTGVANAGLVYFNNRLLAMSEDDVPYQVQVLPSPGDLET<br/> GRYDFAEQLKSTMIAPHPKIDPVSGELFALSVDVQKPYLKSFRFSTDG<br/> KKSPDVEIPLDVPTMMHDFAITENYVVIPDQQVVFKLQEMIKGGSPVI<br/> YDKNKKSRFGILPKNANDSENIWVESPETFCFHLWNAWEEPETDEVV<br/> VIGSCMTPPDSIFNECSENLSVLSEIRLNLKTGQSTKREIIQSSEQMNL<br/> EAGMVNKNKLGRKTQYAYLAIAEPWPKVSGFAKVDLSTGEVQKHMY<br/> GESRYGGEPLFLPRNVNAEREDDGYILAFCHDEKTKWSELQIVNAMT<br/> LELEATVKLPSRVPGYGFHGTFISSKDLQNQV</p>                                                                                                                                                                                                                                                                                                                                                                                                                                                                                                                                                                                                                                            |
| LbCCD4-2 | <p>MNAFTSTLLPYPKTLRSPNRTSSFSVNTKTSSYTSPKATAKSSSTKQH<br/> NKPPRKPLLEPSFPEVILNACDDFIDTFINPPHPSVDPKYVLTANFAPV<br/> DELPPTECEVVKGSLPPYLDGAYIRNGSNPQYLPRGPFHLFDGDGMLH<br/> STRISQGKAIFCSRYVKTYKYLLEKEAGFSIIPNLFSDFNSRISSVTRGAV<br/> SIARTKFGQFDPSNGIDLANTSLALFGGNLFALCESDLPYGIKLAPNGDI<br/> IPIGRHDFDGNLFMNMTAHPKIDPNTGEAFAFRYGPISPFLTYFRIDPNG<br/> TKSRDVPIFSMTHPSFVHDFAITKNYAIFPDIQIEMNPCALLTRDSPVGY<br/> NSKKVARLRVIPHYARDESEMKWFEVPGFNMINAINAWEEDDGDITIV<br/> VIAPNTISVEHFVERLDLIHASIEKVKIDLKTRMVRRYPVSTRNLDLASI<br/> NPAYVGKKNKYVQLIYDLYFFRTTFKRMNILFNYSLSNSSFYILYLFISL<br/> MVVEFFALLEFLKVKPYFVAVMSKLTAKRIQAMNAFTFSFTSTLLPHPKT<br/> LRSPNRTSSFSVNPKTSSYTSPKATAKSSSSKQHNKPPRKPLLEPSFPEVI<br/> LNACDDFIDTFINPPRHPSIDPKYVLTNNFAPVDELPPTECEVVKGSLPP<br/> CLDGAYIRNGSNPQYLPRGPFHLFDGDGMLHSTRISQGKAIFCSRYVK<br/> TYKYMVEKEAGFSIIPNLFSDFNSLMASVSRGAVSIARTNLGQFDPSNG<br/> IGLANTSLALLGGNLFALYETDLPYAIKLAPNGDIITIGRHDFDGNLSTN<br/> MTAHPKIDPNTSEAFASFSGPIPPFLTFFRIDPNGTKSRGVPIFSMTRPSF<br/> VHDFAITKNYAIFPDIQIEMNPFKPIITGGSPVGFNSRKVPRLGVIPRYAT<br/> NESEMKWFEVLGFNMVHAINAWEEDSGDTIVVIAPNLISA EHL SKMD<br/> LIHASIEKVKIDLKGTGTVSRNPMSTRNLELAGINPTYVGKKNKYIYAAI<br/> GDPWPKAKGVVKLDVSISEIEHRDCIVATRIFGPNCFCSEPFVVEKDPN<br/> NVFAADED DGYVVCYMHNESTREASFLVMDAKSHDLEIVAVVKLPRR<br/> VPYGFHGFHIFVKESDLNML</p> |
| LbCCD4-3 | <p>MLSLFPSLPHYHYHTPKLFSPNRTSPFSSVNPKTSSYTSPKATAKSPSSKQ<br/> HDKPPRKPLLEPSFLEVSLNACEDFIDTFINPLHHPSVDPKCVLADNFAP<br/> VDELPPTECEVVKGKLPPCLDGAYIRNGPNPQYLPRGPFHLFDGDGML</p>                                                                                                                                                                                                                                                                                                                                                                                                                                                                                                                                                                                                                                                                                                                                                                                                                                                                                                                                                                                                                                                                                                                          |

|         |                                                                                                                                                                                                                                                                                                                                                                                                                                                                                                                                                                                                                                                                                    |
|---------|------------------------------------------------------------------------------------------------------------------------------------------------------------------------------------------------------------------------------------------------------------------------------------------------------------------------------------------------------------------------------------------------------------------------------------------------------------------------------------------------------------------------------------------------------------------------------------------------------------------------------------------------------------------------------------|
|         | HSTRISQGKAIFCSRYVQTYKYLVDKEARFSVVPNPFSDFNGLMASVS<br>RGAVSIARTILGQFDPRNGIGRANTSLALFGGNLFALYEADLPYAIAKLAP<br>DGDIIITIGRHDFDGNLSTTMTAHPKIDPNTNEAFALRYGPIPPFLTYFRID<br>PNGTKSRGVPIFSMTRPSFVHDFAITKNYAIFPDIHIEVGPFALITCGSPL<br>GSDSRKVPRLGVIPRYATDESEMKWFEVPGFNMIHAINAWEEDDGDTI<br>VVIGTNIISVEHFFERWDLIHTSIEKVKIDLKTGTVSRHPVSTRNLELAVI<br>NTAYIGKKNKYIYAAIGEPWPKAKGVVKLDISISETDRRDCIVATRIFGP<br>NCFCSEPFVAKDPNNVFAADEDGGYVVCYMHDEIQENQVSW                                                                                                                                                                                                                                               |
| LbNCED1 | MATSSPATNTWIKPKISMPSSREFGHSSNSISLLKNKPNKITCSLQAPPIL<br>HFPKQQSSNYQTPKTNPTIPTSKPTTKISHPKQENKSSSSSPWNLVQKAA<br>AMALDAVESVLTKEHEHPLPKTADPRVQISGNFAPVPENPVVTQSLPVT<br>GKIPKCVNGVYVRNGANPLFEPTAGHHFFDGDGMVHAVEFKNGSASY<br>ACRFTETERLVQEKALGRPVPFKAIGELHGHSGIARLMLFYARGVFGL<br>VDHSNGTG VANAGLVYFNNRLLAMSEDDLPHYHVRVTANGDLETDGR<br>FDFDQGLKSTMIAHPKLDPVSGELFALSVDVIQKPYLKYFRFSKNGEK<br>SNDVEIPVEDPTMMHDFAITTEKFVVIPDQQVVFVKMSEMIRGGSPVVYD<br>KNKVSFRGILDKYAKDGSGLKWVEVPDCFCFHLWNAWEEPETDEIVV<br>IGSCMTPPDSIFNECDEGLESVLSEIRLNLKTGKSTRKAIQNEEEQVNL<br>EAGMVNRNKLGRKTQYAYLAIAEPWPKVSGFAKVDLFTGEINKFFYG<br>DNKYGGEPFLPRDPNSKDEDDGYILAFVHDEKEWKSELQIVNAMTL<br>KLEATVKLPSRVPYGFHGTFINAKDLANQA |
| LrCCD1A | MGRKEDDDGGVVVVVKPKPGKGLIAKAVDLLEWGIVKLMHDASKPLH<br>YLQGNFAPTDETPPLNDLIVQGHLPECLNGEFVRVGPNNPKFAPVAGYH<br>WFDGDGMIHGLRIKDGYATYVSRYVRTSRLKQEEFFGGAKFMKIGDL<br>KGLFGLFTVYMQLLRTKLKVLDISYGNGTANTALVYHHGKLLALSEA<br>DKPYALKVLEDGDLQTLGMLDYDKRLAHSFTAHPKVDPVTGEMFTF<br>GYSHTPPYITYRVISKDGIMQDPVPITPEAIMMHDFAITENYAIMMDLP<br>LCFRPKEMVKNNKLAFTFDGTTKARFGVLARYANNEALIKWFELPNC<br>FIFHNANAWEEGDEVVLITCRVQNPDLDMVNGGVKENLENFCNELYE<br>MRFNMKSGAASQKKLSESAVDFPRINESYTGRKQRYVYGTTLNSIAK<br>VTGIIKFDLHAEPETGKSQLEVGGNVQGIFDLGPGRFGSEAVFVPRQPG<br>TECEEDDGYLIFFVHDENTGKS AVNVIDAKTMSAEPVAVVELPKRVPY<br>GFHAFFVTEEQIQEQAKL                                                                         |
| LrCCD4  | MDAFSSTFLSTLSQHPKSLLSPYNYSPNSPCSPALKVSSVRMEERPQTT<br>TTRTKPQEKPTPSPPKPTPKKELPIKPIPSRTPLEPSFPSVIFNAFDDFINTF<br>IDPPLRSSIDPRYVLSDNFAPVDELPPTECEVVEGSLPPCLDGAYIRNGP<br>NPQYLPRGPYHLFDGDGMLHSIRISQGKATLCSRYVKTYKYTIERDAG<br>SPVIPNVFSGFNGLTASAARGAITAARAIAAGQFNPTNGIGLANTSLALFG<br>GKLFAIGESDLPYAIAKIAPDGDIIITLGRHDFDGNLFMSMTAHPKIDPETN<br>EAFAFRYGPIPPFLTYFRIEPNGTKTPDVPIFSMTRPSFLHDFAITKKYAIF<br>SDIQIGMNPIELIRGGSPVGADSGKIPRLGVIPRYAKDESKMRWFDVPG<br>FNIVHAINAWDEDGGDTIVLVAPNLSVEHTLERMDLIHACVEKVKIDL<br>KTGMVSRHPVSTRNLDFGVINPAYVGKNNKYVYAAIGDPMPKVTGVA<br>KLDVSAETDRRDCIVACRLFGEGCFGGEPPFVAKDANNPEADEDGGY<br>VVSYPVHNEKTGESRFLVMDAKSPNLDIVA AVKLPRRVPYGFHGLFVRE<br>SDLNKL         |
| LrNCED1 | MATSSPATNTWIKPKISMPSSREFGHSSNSISLLKNKPNKITCSLQAPPIL                                                                                                                                                                                                                                                                                                                                                                                                                                                                                                                                                                                                                                |

|         |                                                                                                                                                                                                                                                                                                                                                                                                                                                                                                                                                                                                                                                                                                       |
|---------|-------------------------------------------------------------------------------------------------------------------------------------------------------------------------------------------------------------------------------------------------------------------------------------------------------------------------------------------------------------------------------------------------------------------------------------------------------------------------------------------------------------------------------------------------------------------------------------------------------------------------------------------------------------------------------------------------------|
|         | <p>HFPKQQSSNYQTPKTNPTSKPTTKISHPKQENKSSSSSPWNLVQKAA<br/> AMALDAVESVLTKHELEHPLPKTADPRVQISGNFAPVPENPVQTQSLPVT<br/> GKIPKCVNGVYVRNGANPLFEPTAGHHFFDGDGMVHAVQFKNGSAS<br/> YACRFTETERLTQEKAALGRPVPFKAIGELHGHSGIARLMLFYARGVFG<br/> LVDHSNGTGVANAGLVYFNNRLLAMSEDDLPHYHVRVTANGDLETG<br/> RVDFDGLKSTMIHPKLDPVSGELFALSVDVIQKPYLKYFRFSKNGE<br/> KSNDVEIPVEDPTMMHDFATEKFVVIPDQQVVKMSEMILGGSPVVY<br/> DKNKVSFRGILDKYAKDGSGLKWVEVPDCFCFHLWNAWEEPETDEIV<br/> VIGSCMTPPDSIFNECDEGLSVLSEIRLNLKTGKSTRKAIQNEEEQVN<br/> LEAGMVNRNKLGRKTQYAYLAIAEPWPKVSGFAKVDLFTGEINKFFY<br/> GDNKYGGEPLFLPRDPNSKDEDDGYILAFVHDEKEWKSELQIVNAMT<br/> LRLEATVKLPSRVPGFHGTFINAKDLANQA</p>                                                        |
| LrNCED6 | <p>MSFSSSTVQTIKPHNSPSFCKILINPTKINTSTALPIRQFPPLVPPLPSPST<br/> LVEPKIFPLKIEPPKLNPLQKLASSTLDMSEKSVVTKLEKKHKLNPVD<br/> PEIQLEGNFAPVQENPVQHGLEVVGQIPSTLNGVYVRNGANPLFEPTN<br/> GHHLFDGDGMIHAVKLDSSNNKASYSCRFTRTSRLVQEAAGRPVFPK<br/> PIGELHGHGLGLARLALFFARASFGGLVDATKGTGVANAGLIYFNGKLLA<br/> MSEDDLPHYSVRVTDGDLETGGRYNFDGQINDPLIAHPKVDPVRGELY<br/> TLYNLIKPKPFLKFFKFDTGCGNKSRLDISISLQDPSMIHDFAITENNVIIPV<br/> YQVVFKLSEMLRGGSPVIHDPNKISRFGVLSKDDHDESRIRWIDVPNCF<br/> CMHLWNAWEEKNEDYDETIVIIGSCMSPPEISIFSGSDEPLKSELSEIRLN<br/> LRTGDSTRRVIVSGMNLEAGQVNKNKLGQKTKYAFMAIAEPWPKCSG<br/> LAKVHLVTGNVTKFLYGDERFGGEPYFVPSKKEGEDEGYIMSHVRD<br/> DRKEESELVIVNAATMKQVASVKIPTRVPYGFHGTFFVSSQDLCNQSSSC</p>                |
| NtCCD4  | <p>MDAFSSTFLSTLSQHPKSLLSPNYSPNTSSSPILKVSSVRIERPQTTTTT<br/> TRTKPQEKPTSPYTPPKDTPKRQLPTKSITTKKPVESFSPSVIFNAFDDF<br/> VNTFIDPPLKPCVDPKYILSNNFAPVDELPPTECEVVVGSLLPPCLDGAYI<br/> RNGPNPQYLPRGPYHLFDGDGMLHSIKISQSKATLCSRYVKTYKYTIE<br/> REAGSPVFPNVFSGFNGLTASAARGAITAARAIAAGQFNPTNGIGLANTS<br/> LALFGGKLFALGESDLPYAVKLAPDGDITLGRYDFDGLFMSMTAHP<br/> KIDPDTNEAFAFRYGPMPPLTYFRIEPNGTKTPDVPIFSMTRPSFLHDF<br/> AITNKFAIFSDIQIGMNPLEFITGGSPVSSDSGKIPRLGVIPRYAKNESEM<br/> KWFDVPGINIVHAINAWDEDDGDTIVMVAPNILSVEHTLERMDMIHAS<br/> VEKVKIDLKSGMVSQRPLSTRNLDFGVINPAYVGKKNKYVYAAIGDP<br/> MPKIAGIAKLDVSVAEADRRDCIVACRLFGEGCFGGEPYFVANNSAAD<br/> EDDGYVVSFVHNEKTGESRFLVMDAKSPNLDIVA AVKLPRRVPGFH<br/> GLFVRETDLRKLM</p> |
| NtCCD7  | <p>MQAKACHNIIPPKLLPPAKLPSTASHITLPSHVPRAITITTSPTHEVYTPV<br/> PEIDDTITAFWDYQFLFVSQRSEATEPITLRVVEGAIPTDFPSGKYILT<br/> PGLFADDHGSTVHPLDGHGYLRTFEIDGGSGQVKFMARYIETEAQAEE<br/> RDPVTGKWRFTHRGPFVSVLKGGKMVGNTKVMKNVANTSVLQWGGR<br/> LFCLWEGGDPYEIDSKTLKTVGKFELINNCKSLAEQKKLINGDFLDVA<br/> AQILKPILYGVFKMPPKRLLSHYKIDARRNRLLIASCNAEDMLLPRSNF<br/> TFYEFDSNFQLLQSQEFDIPDHLMIHDWAFTDTHYILFGNRIKLDIPGS<br/> MTAVCGLSPMISALSVNPSKATSPIYLLPRFSDHNQTNIVQRDWRKPI<br/> EAPTQMWVLHVGNAFEEDKENG NVNIQIQASGCSYQWFNFQKMFGY<br/> DWQSGKLDPSMMNVEEGEEKLLPHLVQVSISLDTNGNCTRSSVNDLN</p>                                                                                                                                       |

|          |                                                                                                                                                                                                                                                                                                                                                                                                                                                                                                                                                                                                                   |
|----------|-------------------------------------------------------------------------------------------------------------------------------------------------------------------------------------------------------------------------------------------------------------------------------------------------------------------------------------------------------------------------------------------------------------------------------------------------------------------------------------------------------------------------------------------------------------------------------------------------------------------|
|          | TQWNKAADFPAMNPDYSGKKNEYVYAATSSGSRQALPHFPFDTVVKL<br>NTADKSVRKWSAGRRRFIGEPVFIPRGITEDDGYLLVVEYAVSTQRCYL<br>VILDAQIIGEKNEVVARLEVPRHLNFPLGFHGFWAPSNTGQGNLPNFES<br>KCKDSWSMLEDNMVNLGNSKNSR                                                                                                                                                                                                                                                                                                                                                                                                                              |
| NtCCD1-1 | MGRINGVARIEGGVVVVDPKPQTGLTAKAIDLLERVMVKLMHDSSKP<br>LPFLQGNYPPTDETPPLTNLPVKGHLPECLNGEFVRVGPNNPKFAPVAGY<br>HWFDGDGMIHGLQIKDGKATYVSRFVRTSRLKQEEFFGGAKFMKIGD<br>LKGLFGLFSVYIYMLREKLKVLDTSYGNGAANTAMIYHHGKLLALHE<br>GDKPYVVKVLEDGDLQTLGMLDYDKRLQHSFTAHPKVDPVTGEMFT<br>FGYSQTPPYATYRVISKDGVMMQDPVPITIPASVMMHDFAITENYSIMMD<br>LPLYFKPKEMVKNKKLVYSFDPTKKARFGILPRYAKNESLIKWFELPN<br>CFIFHNANAWEEGDDVVLITCRLQNPDLDAINGTEKEQQRDGFTNELY<br>EMRFNMKTGLASQKKLSESAVDPRVNENYTGRKQRYVYGTILNHM<br>AKITGVVKFDLHAEPETGKTKLEVGGNVLGIFDLGPGRFGSEAIFVPC<br>QPGTECEEDDGYLILFVHDENTGKSSVNVIDAKTMSAEPVAVVELPKR<br>VPYGFHAFFVTEEQIQEQAKL     |
| NtCCD1-2 | MGRKEEINGVTRIEGGVVVVDPKPQNGLTAKAIDLLERVMAKLMHDS<br>SKPLPFLQGNYPPTDETPPFKNLPVKGHLPECLNGEFVRVGPNNPKFAP<br>VAGYHWFDGDGMIHGLHIKDGKATYVSRFVRTSRLKQEEFFGGAKFM<br>KIGDLKGLFGLFSVYIYMLREKLKVLDTSYGNGTANTAMIYHHGKLL<br>ALHEGDKPYVVKVLEDGDLQTLGMLDYDKRLQHSFTAHPKVDPVTG<br>EMFTFGYSQTPPYATYRVISKDGVMMQDPVPITIPASVMMHDFAITENYS<br>IMMDLPLYFKPKEMVKNKKLAYSFDPPTKKARFGILPRYAKNESLIKWF<br>ELPNCFIFHNANAWEEGDDVVLITCRLQNPDLDAINGTEKEQQRDGFT<br>NELYEMRFNIKTGLASQKKLSESAVDPRVNENYTGRKQRYVYGTILN<br>HMAKITGIVKFDLHAEPETGKTKLEVGGNVLGIFDLGPGRFGSEAIFVP<br>RQPGTECEEDDGYLILFVHDENTGKSSVNVIDAKTMSAEPVAVVELPK<br>RVPYGFHAFFVTEEQILEQAKL |
| NtCCD1-3 | MGRKEEDDTVERTEGGVVVNVNPKPKKGVIGKAIDLLEKVIKLMHDS<br>TKPLHYLSGNFAPPTDETPPLKDLSVTGHLPECLNGEFVRVGPNNPKFAPV<br>AGYHWFDGDGMIHGLRIKDGKATYVSRYVRTSRLKQEEFFGGAKFM<br>KIGDLKGLFGLFTVYMQVLRAKLKVLDTITYGNGTANTALVYHHGKLL<br>ALSEADKPYALKVMEDGDLQTLGMLDYDKRLAHSFTAHPKVDPVTG<br>EMFTFGYSQNPPYITYRVISKGGIMQDPVPITIPPEIMMHDFAITENYAI<br>MMDLPLCFRPKEMVKNQNLAFFFDATKNARFGVLPYRQAQSEALIKWF<br>ELPNCFIFHNANAWEEGDEVVLITCRVQNPNDLMDVNGVVKEKLENFS<br>NELYEMRFNMKSGAASQKKLSESAVDPRINENYTGRKQRYVYGTTL<br>DSIAKVTGIIKFDLHAEPETGKAQLEVGGNVQGIFDLGPGRFGSEAVFV<br>PRQPGTECEEDGGYLIFVHDENTGKSAVNVIDAKTMSAEPVAVVELP<br>KRVYGFHAFFVTEEQIQEQAKL  |
| NtCCD8B  | MASFASSATKIYCTNILSHDRFDHGKDEPYFGKVKINEKTKKNLDLKL<br>VTNVA SQLPVIVLPPDEVVKKEKKLAAWTSVRQERWEGELVVEGDLP<br>LWLNGTYLRNGPGQWHIGNYNFRHLFDGYATLVRLHFENGRIMGHR<br>QIESDAYKAAKHNNKICCREFSEVPKPDNFISYIGDMAKLLSGAPLTDN<br>ANTGVVKLGDGRVVCLTETIKGSIVIDPNTLDTIGKFEFSDSLGGLIHSA<br>HPIVTESEFWTLIPDLINPGYLVVRMEQGTNERNYIGRVSCRGGPAAG<br>WVHSFPVTEHYIIVPEMPLRYCAQNLLKAEPTPLYKFEWHPHSGFMH                                                                                                                                                                                                                                          |

|             |                                                                                                                                                                                                                                                                                                                                                                                                                                                                                                                                                                                                                                                                                                                      |
|-------------|----------------------------------------------------------------------------------------------------------------------------------------------------------------------------------------------------------------------------------------------------------------------------------------------------------------------------------------------------------------------------------------------------------------------------------------------------------------------------------------------------------------------------------------------------------------------------------------------------------------------------------------------------------------------------------------------------------------------|
|             | <p>VMCKASGNIVASVEVPLFVTFHFINAYEEKDEDGRVSAVIADCCEHSA<br/> DTTILDKLRLENLRSFNGEDVLPDARVGRFRIPLDGSPYGELEAALNPN<br/> EHGRGMDMCSFNPSYLGKKYRYAYACGAKRPCNFPNTLTKIDLFEKK<br/> AKNWYDEGAVPFEPFFVPRPGATEEDDGVVISMISDKNGEGYALILDG<br/> STFEEIARAKFPYGFYGLHGCWVPPK</p>                                                                                                                                                                                                                                                                                                                                                                                                                                                            |
| NtCCD1-like | <p>MGRKEEINGVTRIEGGVVVVDPKPQNGLTAKAIDLLERVMMAKLMHDS<br/> SKPLPFLQGNYPPTDDETPPFKNLPVKGHLPECLNGEFVRVGPNNPKFAP<br/> VAGYHWFDDGDMIHGLHIKDGKATYVSRFVRTSRLKQEEFFGGAKFM<br/> KIGDLKGLFGLFSVYIYMLREKLKVLDTSYGNGTANTAMIYHHGKLL<br/> ALHEGDKPYVVKVLEDGDLQTLGMLDYDKRLQHSFTAHPKVDPVTG<br/> EMFTFGYSQTPPYATYRVISKDGVMMQDPVPITIPASVMMHDFAITENYS<br/> IMMDLPLYFKPKEMVKNKKLAYSFDPKTKARFGILPRYAKNESLIKWF<br/> ELPNCFIFHNANAWEEGDDVVLITCRLQNPDLDAINGTEKEQQRDGFT<br/> NELYEMRFNIKTGLASQKKLSESAVDFFPRVNENYTGRKQRYVYGITLN<br/> HMAKITGIVKFDLHAEPETGKTKLEVGGNVLGIFDLGPGRFGSEAFV<br/> RQPGTECEEDDGYLILFVHDENTGKSSVNVIDAKTMSAEPVAVVELPK<br/> RVPGYGFHAFVTEEQILEQAKL</p>                                                                      |
| NtNCED3     | <p>MASTTPASNTWIKPKLSMPSSRDLAYSSNSISLVKKQPNRQLPSINSSLQ<br/> APPILHFPKQSPNYQTPKTTTIPTSKPATISYPKQESTNSSSSSTTSPQWNL<br/> VQKAAAMALDAVESVLTKEHEHPLPKTADPRVQISGNFAPVPENPVS<br/> HSPPVTGKIPKCVQGVYVRNGANPLFEPTAGHHFFDGDGMVHAVQFK<br/> NGSASYACRFTETERLVQEKAALGRPVPFPAIGELHGHSGIARLMLFYA<br/> RGLFGLVDHSRGTGVANAGLVYFNNRLLAMSEDDLPYHVRVTPTGDL<br/> KTVGRFDFDQGLKSTMIAPKLDPVSGELFALSVDVIQKPYLKYFRFS<br/> KNGEKSNDVEIPVEDPTMMHDFATEKFVIIPDQQVVFVKMSEMIRGGS<br/> PVVYDKNKVSFRGVLDKYAKDGEGLKWVEVPDCFCFHLWNAWEEPE<br/> TDEIVVIGSCMTTPPDSIFNECDGGLKSVLSEIRLNLKTGKSTRRAIIQKE<br/> EDQVNLEAGMVNRNKLGRKTRFAYLAIAEPWPKVSGFAKVDLFTGEV<br/> EKFIYGDNKFGEPLFLPRDPNSKAEDDGYILAFVHNEKEWKSELQIV<br/> NAMTMKLEATVKLPTRVPYGFHGTFINAKDMANQA</p> |
| NtNCED1     | <p>MASTTPASNTWIKPKLSMPSSRDLAYSSNSISLVKKQPNRQLPSINSSLQ<br/> APPILHFPKQSPNYQTPKTTTIPTSKPTTISYPKQESTNSSSSSTTSPQWNL<br/> VQKAAAMALDAVESVLTKEHEHPLPKTADPRVQISGNFAPVPENPVS<br/> HSLPVTGKIPKCVQGVYVRNGANPLFEPTAGHHFFDGDGMVHAVQFK<br/> NGSASYACRFTETERLVQEKAALGRPVPFPAIGELHGHSGIARLMLFYA<br/> RGLFGLVDHSRGTGVANAGLVYFNNRLLAMSEDDLPYHVRVTPTGDL<br/> KTVGRFDFDQGLKSTMIAPKLDPVSGELFALSVDVIQKPYLKYFRFS<br/> KNGEKSNDVEIPVEDPTMMHDFATEKFVIIPDQQVVFVKMSEMIRGGS<br/> PVVYDKNKVSFRGVLDKYAKDGEGLKWVEVPDCFCFHLWNAWEEPE<br/> TDEIVVIGSCMTTPPDSIFNECDEGLKSVLSEIRLNLKTGKSTRRAIIQKEE<br/> DQVNLEAGMVNRNKLGRKTRFAYLAIAEPWPKVSGFAKVDLFTGEVE<br/> KFIYGDNKFGEPLFLPRDPNSKAEDDGYILAFVHNEKEWKSELQIVN<br/> AMTMKLEATVKLPTRVPYGFHGTFINAKDMANQA</p> |
| SiCCD1A     | <p>MGRKEDDGVVERIEGGVVVVNPKPRRGITAKAIDLLEWGIVKLMHDSS<br/> KPLHYLQGNFAPTDDETPPLNDLVVQGHLPCLNGEFVRVGPNNPKFAPV<br/> AGYHWFDDGDMIHGLRIKDGKATYVSRVVRTSRLKQEEFFGGAKFM<br/> KVGDLKGLFGLFTVYMQMLRTKLKVLDISYGNSTANTALVYHHGKLL</p>                                                                                                                                                                                                                                                                                                                                                                                                                                                                                              |

|         |                                                                                                                                                                                                                                                                                                                                                                                                                                                                                                                                                                                                                                                                                                                                         |
|---------|-----------------------------------------------------------------------------------------------------------------------------------------------------------------------------------------------------------------------------------------------------------------------------------------------------------------------------------------------------------------------------------------------------------------------------------------------------------------------------------------------------------------------------------------------------------------------------------------------------------------------------------------------------------------------------------------------------------------------------------------|
|         | ALSEADKPYALKVLEDGDLQTLGMLDYDKRLTHSFTAHPKVDAVTGE<br>MFTFGYAHTPPYITYRVISKDGMQDPVPITIPPEPIMMHDFAITENYAIM<br>MDLPLCFRPKEMVKKNKLAFTFDATKKARFGVLPRYANNEALIRWFE<br>LPNCFIFHNANAWEEGDEVVLITCRLVNPDLDMVNGAVKEKLENFCN<br>ELYEMRFNMKSGAASQKKLSESAVDFPRINENYTGRKQRYVYGTTLN<br>SIAKVTGVIKFDLHAEPETGKSQLEVGGNVQGIFDLGPGRFGSEAVFVP<br>SRPGTEREEDDGYLIFVHDENTGKSAVNVIDAKTMSAEPVAVVELPK<br>RVPYGFHAFFVTEEQIQEQAKL                                                                                                                                                                                                                                                                                                                                        |
| SICCD7  | MDLQFVSLPPNSKTKAKMQAKACHNINNIPPKLLPPAKLPSTVAMSPS<br>QLTLPSHVARAITITTSPTHEVYTPEIDDTVAYWDYQFLFVSQRSEATE<br>PVSLRVVEGSIPSDFPSGTYYLTGPGLFADDHGSTVHPLDGHGYLRTFE<br>IDGSTGQVKFMARYIETEAQTEERDPVSGKWRFTHRGPFSVLKGGKM<br>VGNTKVMKNVANTSVLQWGGRLFCLWEGGDPYEIDSKTLNTLGKFE<br>LIKNSDQVLEDKKISHSDFLDVAAQLLKPILYGVFKMSPKRLLSHYKID<br>TRNRLLIMSCNAEDMLLPRSNFTFYEFDSNFQLLSQFEFEIPDHLMIH<br>DWAFTDTHYILFGNRIKLDIPGSMTAVCGLSPMISALSVNPSKPTSPIYL<br>LPRFRNNNVERDWRKPIEAPSQMWWLHVGNAFEIDEQNGNLNIQIQ<br>ASGCSYQWFNFQKMFGYDWQSGKLDPSMMNVEEGEEKLLPHLVQV<br>CINLDKKGNCTKCSVNDLNPEWNKAADFPAMNPEFSGRKNRYIYAAT<br>CTGSRQALPHFPFDAVVKLNAVDKSVQKWSAGRRRFIGEPVFIPRGTN<br>KEDDGILLVVEYAVSTQRCYLVILDAQKIGEKNEVVARLEVPRHLNFP<br>LGFHGFWAPTNSLANLQKIESKCKNSWSMMKDNMVKLGQ |
| SICCD1B | MGMNEEDGVARIEGVVVVDPKPKQNGVAAKAIDWVEWAIKLMNDST<br>KPLPFLQGNFAPTDETPPLKNLPVIGHLPECLNGEFVRVGPNPKEFAPVA<br>GYHWFDGDGMIHGLQIKDGKATYVSRFVRTSRLKQEEFFGGAKFMKI<br>GDLKGLFGLFSVYIYMLREKLKVLDTSYGNGTANTAMIYHHGKLLAL<br>HEGDKPYVVKILEDGDLQTLGMLDYDKRLQHSFTAHPKVDPVTGEM<br>FTFGYSQTPPFATYRVISKDGVQMOPVPITIPASVMMHDFAITENYAIM<br>MDLPLYFRPKEMVKKNQLAYSFDPTKKARFGVLPRYAKNESLIKWFE<br>LPNCFIFHNANAWEEGDDVVLITSRLQNPDLDAIKGTEKEEQRDGFTN<br>ELYEMRFNMKNGVASQKKLSEAAVDFPRINENYTGRKQRYVYGTTLN<br>NVAQITGVVKFDLHAEPETGKTLEVGGNVPGIFDLGPGRFGSEAFVVP<br>RQPGTECEEDDGYLILFVHDENTGKSSVNVIDAKTMSAEPVAVVELPK<br>RVPFGFHAFFVTEEQIQEQAKM                                                                                                                           |
| SICCD8  | MASLASSTTKIYCNKILPDMFDHGHGKSHLGSKLKNNEKNKKKLDLK<br>LVTKVANQLPVIVPPPQDEVISKEKKLAAWTSVRQERWEGELVVEGEL<br>PLWLNGTYLRNGPGQWHIGDYNFRHLFDGYATLVRLHFENGRLLIMGH<br>RQIESDAYKAAKISKKICYREFSEVPKVDNFLSYIGDMAKLLSGASLTD<br>NANTGVVKLGDGRVVCLTETIKGSIVIDPNTLDTIGKFEYSDSLGGLIH<br>SAHPVVTDSFITLIPDLMPGYTVVRMEAGTNERKYIGRVSCRGGPA<br>PGWVHSFPVTENYVIVPEMSLRYCAKNLLKAEPTPLYKFEWHPDSKA<br>FVHVMCKASGNIVASVEVPLYVTFHFINGYEEKDEDGRVTAVIADCCE<br>HSADTTILDKLRLNLRSFNGKDVLPDARVGRFRIPLDGSPYGELEAAL<br>DPNEHGKGMDMCSMNPAYLGKKYRYAYACGAKRPCNFPNTLTIDLF<br>DKKAKNWDYDEGAVPSEPFFVARPGATEEDDGVVISMISDKNGEGYALI<br>LDGSTFEEIARAKFPYGLPYGLHGCWVPKI                                                                                                                 |
| SINCED6 | MQTIKPLNSPSFSCKILINPSKKNTITLPRTRIPPLSSPSSSPSQSSSNSDES                                                                                                                                                                                                                                                                                                                                                                                                                                                                                                                                                                                                                                                                                   |



|          |                                                                                                                                                                                                                                                                                                                                                                                                                                                                                                                                                                                                                                                                                                  |
|----------|--------------------------------------------------------------------------------------------------------------------------------------------------------------------------------------------------------------------------------------------------------------------------------------------------------------------------------------------------------------------------------------------------------------------------------------------------------------------------------------------------------------------------------------------------------------------------------------------------------------------------------------------------------------------------------------------------|
|          | <p>KIFPLKIDPPKLNLFQKIASALDMLEKSIVTKLEKKHKLNRTVDPEIQL<br/>EGNFAPVHESSVQHGLEVVGHIPSNLTGVYVRNGANPLYKPINGHHLF<br/>DGDGMIHAVKLDKNNKASYSCRFTQTSRLVQEASLGRPVPFKPIGEL<br/>HGHLGLARLALFFARASLGLVDATKGTGVANAGLVYFNGRLLAMSED<br/>DLPYNVIKEDGDLESNGRYDFNGQINDPLIAHPKVDPITGEFYTLSYNI<br/>LKKPYLKLKFDTCGIKSRDISISLQNPSMIHDAITESHVIIPDYQVVFK<br/>LSEMIRRGSPVVHDPNKVSRFGVLSKDDHDESRIKWIDVPNCFCMHL<br/>WNAWEENHEESGRSTRRIIVSGMNLEAGQVNKTRLGEKTRYTFMAIA<br/>EPWPKCSGLAKIDLVTGNVTKFLHGDDRFGGEPYFVPSTKEGEDEGY<br/>LMSYVRDERNEKSELIINAKNMKQIALVKIPKRVPGFHGTFVSSQDL<br/>CNQFSC</p>                                                                                                                                     |
| O24023.2 | <p>MATTTSHATNTWIKTKLSMPSSKEFGFASNSISLLKNQHNQRQSLNINSS<br/>LQAPPILHFPKQSSNYQTPKNNTISHPKQENNNSSSSSTSKWNLVQKAA<br/>AMALDAVESALTKEHEHPLPKTADPRVQISGNFAPVPENPVCQSLPVT<br/>GKIPKCVQGVYVRNGANPLFEPTAGHHFFDGDGMVHAVQFKNGSAS<br/>YACRFTETERLVQEKAALGRPVPFKAIGELHGHSGIARLMLFYARGLFG<br/>LVDHSGGTGVANAGLVYFNNRLLAMSEDDLPYHVKVTPGTDLKTEG<br/>RFDGDLGQLKSTMIAHPKLDPVSGELFALSVDVIQKPYLKYFRFSKNGE<br/>KSNDVEIPVEDPTMMHDAITENFVVIPDQQVVFVKMSEMIRGGSPVVY<br/>DKNKVSFRGILDKYAKDGSCLKWVEVPDCFCFHLWNAWEEAETDEIV<br/>VIGSCMTPPDSIFNECDEGLKSVLSEIRLNLKTGKSTRKSIIENPDEQVN<br/>LEAGMVNRNKLGRKTEYAYLAIAEPWPKVSGFAKVNLTGEVEKFIY<br/>GDNKYGGEPLFLPRDPNSKEEDDGYILAFVHDEKEWKSELQIVNAMS<br/>LKLEATVKLPSRVPGFHGTFINANDLANQA</p> |
| K4CJJ1.1 | <p>MTSTIANYRVSHSFSPSTSYSLDFTLPSKSISMKNHTTTTKTKIHSALLTL<br/>PKQNNTPKNQPQFQTSHWNFFQKAAAKALDIVESALVSRELQNPLPK<br/>TADPRVQIAGNFAPVPEQSVRHNLPVTGTIPDCINGVYVRNGANPLFEP<br/>VAGHHLFDGDGMVHAVTVENGVSYSRFTETERLVQERELGHPVFP<br/>KAIGELHGHSGIARLLLIFYARGVFGVLVDHSHGTGVANAGLVFFNNRLL<br/>AMSEDDVPYHVQVLPSGDLQTVGRYNFDDQLKSTMIAHPKIDPVSGE<br/>LFALSVDVVQKPYLKSFKFSPDGEKSPDVEIPLDVPTMMHDAITENY<br/>VVIPDQQVVFVKLQEMIKGGSPVIYDKNKKSRFGILPKNAENSENIIWVE<br/>SAETFCFHLWNAWEEPETDEVIVIGSCMTPPDSIFNECNENLKSVLSEIR<br/>LNLKTGESTRRQLLSPSDQVNLEAGMVNRNKLGRKTQFAYLAIAEPW<br/>PKVSGFAKVDLSTGEIKKHIYGDKRYGGEPLFLPRNVNSEKEDDGYIL<br/>AFCHDEKTWKSELQIVNAMTLELEATVKLPSRVPGFHGTFISSKDLQ<br/>NQV</p>                         |
| AtCCD1   | <p>MAEKLSDGSIISVHPRPSKGFSSKLLDLLERLVVKLMHDASLPLHYLS<br/>GNFAPIRDETPPVKDLPVHGFLPECLNGEFVRVGPNNPKFDAVAGYHWF<br/>DGDGMIHGVRIKD GKATYVSRYVKTSRLKQEEFFGA AKFMKIGDLKG<br/>FFGLLMVNIQQLR TKLKILDNTYGNGTANTALVYHHGKLLALQEADK<br/>PYVIKVLEDGDLQTLGIIDYDKRLTHSFTAHPKVDPVTGEMFTFGYSHT<br/>PPYLTYRVISKDGIMHDPVPITISEPIMMHDAITETYAIFMDLPMHFRP<br/>KEMVKEKKMIYSFDPTKKARFGVLPYAKDEL MIRWFELPNC FIFHNA<br/>NAWEEEDEVLITCRLENPDLD MVSGKVKEKLENFGNELYEMRFNM<br/>KTGSASQKKLSASAVDFPRINECYTGKKQRYVYGTILDSIAKV TGIIF<br/>DLHAEAETGKRMLEVGGNIKGIYDLGEGRYGSEAIYVPRETAEEDDG</p>                                                                                                                                          |

|        |                                                                                                                                                                                                                                                                                                                                                                                                                                                                                                                                                                                                                                                                                                     |
|--------|-----------------------------------------------------------------------------------------------------------------------------------------------------------------------------------------------------------------------------------------------------------------------------------------------------------------------------------------------------------------------------------------------------------------------------------------------------------------------------------------------------------------------------------------------------------------------------------------------------------------------------------------------------------------------------------------------------|
|        | YLIFVHDENTGKSCVTVIDAKTMSAEPVAVVELPHRVPYGFHALFVT<br>EEQLQEQLTI                                                                                                                                                                                                                                                                                                                                                                                                                                                                                                                                                                                                                                       |
| AtCCD8 | MASLITTKAMMSHHHVLSSSTRITTLYSDNSIGDQQIKTKPQVPHRLFAR<br>RIFGVTRAVINSAAPSPLPEKEKVEGERRCHVAWTSVQQENWEGELTV<br>QGKIPTWLNGTYLRNGPGLWNIGDHDHFRHLFDGYSTLVKLQFDGGRIF<br>AAHRLLESDAYKAAKKHNRLCYREFSETPKSVIINKNPFSGIGEIVRLF<br>SGESLTDNANTGVIKLGDGRVMCLTETQKGSILVDHETLETIGKFEYDD<br>VLSDHMIQSAHPIVTETEMWTLIPDLVKPGYRVVRMEAGSNKREVVG<br>RVRCRSGSWGPGWVHSFAVTENYVVIPEMPLRYSVKNLLRAEPTPLYK<br>FEWCPQDGAFIHVMSKLTGEVVASVEVPAYVTFHFINAYEEDKNGDGK<br>ATVIIADCCEHNADTRILDMLRLDTLRSSHGHDLPLDARIGRFRIPLDG<br>SKYGKLETAVEAEKHGRAMDMCSINPLYLGQKYRYVYACGAQRPCNF<br>PNALSKVDIVEKKVKNWHEHGMIPSEPPFFVPRPGATHEDDGVVISIVSE<br>ENGGSFAILLDGSSFEELARAKFPYGLPYGLHGCWIPKD                                                           |
| AtCCD7 | MLTKMSLPIPPKFLPPLKSPPIHHHQTTPPLAPPRAAISISIPDTGLGRTGT<br>ILDESTSSAFRDYQSLFVSQRSETIEPVVIKPIEGSIPVNFPSGTYYLAGP<br>GLFTDDHGSTVHPLDGHGYLRAFHDGNKRKATFTAKYVKTEAKKEE<br>HDPVTDTWRFTHRGPFVSVLKGGKRFGNTKVMKNVANTSVLKWAGRL<br>LCLWEGGEPYEIESGSLDTVGRFNVENNGCESCDDDDSSDRDLSGHDI<br>WDTAADLLKPILQGVFKMPPKRFLSHYKVDGRRKRLLTVTCNAEDML<br>LPRSNFTFCEYDSEFKLIQTKEFKIDDHMMIHDWAFTDTHYILFANRVK<br>LNPIGSIAAMCGMSPMVSALS LNPSNESSPIYILPRFSDKYSRGGGRDWR<br>VPVEVSSQLWLIHSGNAYETREDNGDLKIQIQASACS YRWFDFQKMFG<br>YDWQSNKLDPSVMNLNRGDDKLLPHLVKVSM TLDSTGNCNSCDVEP<br>LNGWNKPSDFPVINSSWSGKKNKYMYSAASSGTRSELPHFPFDMVVK<br>FDLDSNLVRTWSTGARRFVGEPMFVPKNSVEEGEEEDDGYIVVVEYA<br>VSVERCYLVILDAKKIGESDAVVSRLLEVPRNLTFPMGFHGLWASD |
| CsCCD1 | MGEVAKEEIEERRSIVAVNPQPSKGLVSSAVDLIEKAVVYLFHDKSKPC<br>HYLSGNFAPVVDETPPCPDLRVRGHLPECLNGEFVRVGP NPKFMPVAG<br>YHWFDGDGMIHGMRIKD GKATYVSRYVKTSRLKQEEYFEGPKFMKIG<br>DLKGFFGLFMVQMQLLR AKLKVIDVSYGVGTGNTALIYHHGKLLALS<br>EADKPYVVVKVLEDGDLQTLGLLDYDKRLSHSFTAHPKVDPFTDEMFT<br>FGYAHTPPYVTYRVISKDGVMRDPVPITIPASVMMHDFAITENYSIFMD<br>LPLYFQPKEMVKGKGLIFSFDATKKARFGVLP RYAKDDSLIRWFELPN<br>CFIFHNANAWEEGDEVVLITCRLENPD LDMVNGAVKEKLENFKNELY<br>EMRFNMKTGAASQKQLSVSAVDFPRINESYTTRKQRYVYGTILDNITK<br>VKGIIKFDLHAEPEAGKRKLEVGGNVQGIFDLGPGRYGSEAVFVPRER<br>GIKSEEDDGYLIFVHDENTGKSEVNVIDAKTMSAEPVAVVELPNRVP<br>YGFHAFFVNEEQLQWQQTDV                                                                                 |
| CsCCD2 | MANKEEA EKRRKKKPKPLKVLITKVDPKPRKGMASVAVDLLEKAFVYL<br>LSGNSAADRSSSSGRRRRKEHY YLSGNYAPVG HETPPSDHLPIHGSLPE<br>CLNGVFLRVGP NPKFAPVAGYNWVDGDGMIHGLRIKD GKATYLSRYI<br>KTSRFKQEEYFGRAKFMKIGDLRGLLGFF TILILVLR TTLKVIDISYGRG<br>TGNTALVYHNGLLLALSEEDKPYVVVKVLEDGDLQTLGILDYDKKLSH<br>PFTAHPKIDPLTDEMFTFGY SISPPYLT YRVISKDGVMQDPVQISITSPTI<br>MHDFAITENYAIFMDLPLYFQPEEMVKGK FVSSFHPTKRARIGVLP RYA<br>KDEHPIRWFDLPSCFMTHNANAWEE NDEVVLFTCRLESPDLDMLSGP                                                                                                                                                                                                                                                       |

|         |                                                                                                                                                                                                                                                                                                                                                                                                                                                                                                                                                                                                                                                                                                             |
|---------|-------------------------------------------------------------------------------------------------------------------------------------------------------------------------------------------------------------------------------------------------------------------------------------------------------------------------------------------------------------------------------------------------------------------------------------------------------------------------------------------------------------------------------------------------------------------------------------------------------------------------------------------------------------------------------------------------------------|
|         | AEEEIGNSKSELYEMRFNLKTGITSQKQLSVPSVDFPRINQSYTGRKQQ<br>YVYCTLGNTKIKGIVKFDLQIEPEAGKTMLEVGGNVQGIFELGPRRYG<br>SEAFVPCQPGIKSDEDDGYLIFFVHDENNGKSEVNVIDAKTMSAEPVA<br>VVELPSRVYPYGFHALFLNEEELQKHQAET                                                                                                                                                                                                                                                                                                                                                                                                                                                                                                                 |
| CsCCD2L | MESPATKLPAPLLMLSSSPFLLPSPNKSSSIFLPRKLGPLPPKYYYYNCC<br>HPKSRSISVVS MANKEEAETSKKKPKPLKVLITKVDPKPRKGMASVAV<br>DLLEKAFVYLLSGNSAADRSSSSSGRRRRKEHYL SGNYAPVGHETPPS<br>DHLPIHGS LPECLNGVFLRVGPNPKFAPVAGYNWVDGDGMIHGLRIKD<br>GKATYLSRYIKTSRFBKQEEYFGRKFMKIGDLRGLLGFFTILILVLR TTL<br>KVIDISYGRGTGNTALVYHNGLLLALSEEDKPYVVKVLEDGDLQTLGI<br>LDYDKKL SHPFTAH PKIDPLTDEMFTFGYSISPPYLT YRVISKDGV MQD<br>PVQISITSPTIMHDFAITENYAIFMDLPLYFQPEEMVKGKFVSSFHPTKR<br>ARIGVLP RYAKDEHP IRWFDLPSCFMTHNANAWEE NDEVVLFTCRLES<br>PDL DMLSGPAEEEIGNSKSELYEMRFNLKTGITSQKQLSVPSVDFPRIN<br>QSYTGRKQQYVYCTLGNTKIKGIVKFDLQIEPEAGKTMLEVGGNVQG<br>IFELGPRRYGSEAFVPCQPGIKSDEDDGYLIFFVHDENNGKSEVNVIDA<br>KTMSAEPVAVVELPSRVYPYGFHALFLNEEELQKHQAET |
| CsCCD4b | MEYRLSSSLFHFPSPGNRIFLKHYP SHQDHPITKKKSISINKGGSISRNR<br>SLAAVFC DALDDLITRHSFDPDALHPSVDPHRVLRDNFAPVSEL PPTPCR<br>VVRGTIPSALAGGAYIRNGPNPNHLP SGAHHLFEGDGMLHSLLLPSSE<br>GGRAAIFSSRFVETYKYLVTAKSRQAIFLSVFSGLCGFTGIARALVFFFR<br>FLTMQVDPTKGIGLANTSLQFSNGRLHALCEYDLPYVVRLSPEDGDIS<br>TVGRIENNVSTKSTTAHPKTD PVTGETFSFSYGPIQPYVTYSRYDCDGK<br>KSGPDVP IFSFKEPSFVHDFAITEHYAVFPDIQIVMKPAEIVRGRRMIGPD<br>LEKVPRLG LLLPRYATSDSEMRWFDVPGFNMVHVVN AWEEEEGGEVVVI<br>VAPNVSP IENAI DRFDLLHVS VEMARIELKSGSVSRTL LLSAENLDFGLIH<br>RGYSGRKSRYAYLGVGDPMPKIRGVVKVDFELAGRGE CVVARREFGV<br>GCFGGE PFFVPASEGSGGEEDDGYVVSYLHDEGKGESSFVVM DARS<br>PELEVVAE VVLPRRVPYGFHGLIVTEAELLSQQ                                                    |
| CsCCD4a | MDYRLSSSSLFHFPSPGNRIFLKQSQVLA FQNQPSHQDHPTTKKKSISI<br>NKGGSISRNRSLAAVFC DALDDLITRHSFDPDALHPSVDPHRVLRGNFA<br>PVSEL PPTPCR VVRGTIPSALAGGAYIRNGPNPNPQYLPSGAHHLFEGD<br>GMLHSLLLPSSEGGRAAIFSSRFVETYKYLVTAKSRQAIFLSVFSGLCG<br>FTGIARALVFFFRFLTMQVDPTKGIGLANTSLQFSNGRLHALCEYDLPY<br>VVRLSPEDGDISTVGRIENNVSTKSTTAHPKTD PVTGETFSFSYGPIQPY<br>VTYSRYDCDGKKSGPDVP IFSFKEPSFVHDFAITEHYAVFPDIQIVMKPA<br>EIVRGRRMIGPDLEKVPRLG LLLPRYATSDSEMRWFDVPGFNMVHVVN<br>AWEEEEGGEVVVIVAPNVSP IENAI DRFDLLHVS VEMARIELKSGSVSRT<br>LLSAENLDFGLIHRGYSGRKSRYAYLGVGDPMPKIRGVVKVDFELAGR<br>GECVVARREFGVGCFGGE PFFVPASEGSGGEEDDGYVVSYLHDEGKG<br>ESSFVVM DARSPELEVVAE VVLPRRVPYGFHGLIVTEAELLSQQ                                             |
| CsCCD8b | MQTNLIARARDWTSYLSMDHIRTLKVQKDKSAPIDRSVGPNGGTDRP<br>TEYVKLQSVSLGQSICPNRLIDNVSLEVACVKNYTKRHNLSISISWYLN<br>WFQRGTYLRNGPGLWHIDDNDFRHLFDGYATLVR LHFENGRLTFGHR<br>QVESEAYKAAKKNGR LCYREFSEVPKTDNFLSYVGELASLFS GASLTD<br>NANTGVVVVLGDGRVVCLTETVKGSIEVDPETLDTIGKFEYGDGLGGLV<br>HSAHPIVTEREMWTLLPDLVRAGYAVVRMEAGTNERKVVG RVECRG                                                                                                                                                                                                                                                                                                                                                                                      |

|         |                                                                                                                                                                                                                                                                                                                                                                                                                                                                                                                                                                                                                                                                                                          |
|---------|----------------------------------------------------------------------------------------------------------------------------------------------------------------------------------------------------------------------------------------------------------------------------------------------------------------------------------------------------------------------------------------------------------------------------------------------------------------------------------------------------------------------------------------------------------------------------------------------------------------------------------------------------------------------------------------------------------|
|         | GPAPGWVHSFPVTEHYVVVPEMSLRYCAKNLLKAEPPLYKFESHPE<br>GSYVHVMCKASGKLVASVKVPNFVTFHFINAYEETDEEGRVTAVIADC<br>CEHNDDTTILDKLRLQNLRSFTGQDVLPEARYGRFRIPFDGSDIGELGA<br>ALDPNEHEKGMDMCSANPAYIGKKYRYAYACGAVRPCNFPNTLTKIDL<br>VEKKAKNWYEEGAVPSEPFFVARPGATAEDDGVVISVISDKNGEGYAL<br>VLDGSNFEEIARAKFPYGLPYGLHGCWVPPK                                                                                                                                                                                                                                                                                                                                                                                                       |
| CsCCD8a | MADVGI LNKLEFSLRRRIVRLKRRHSINVACVKNYTKRHNLSISISWYL<br>NWFQRGTYLRNGPGLWHIDDNDFRHLFDGYATLVRLHFENGRLTFGH<br>RQVESEAYKAAKKNGRLCYREFSEVPKTDNFLSYVGELASLFSGASLT<br>DNANTGVVVLGDGRVVCLTETVKGSIEVDPETLDTIGKFEYGDGLGG<br>LVHSAHPIVTEREMWTLLPDLVRAGYAVVRMEAGTNERKVVG RVECR<br>GGPAPGWVHSFPVTEHYVVVPEMSLRYCAKNLLKAEPPLYKFESHPE<br>SGSYVHVMCKASGKLVASVKVPNFVTFHFINAYEETDEEGRVTAVIAD<br>CCEHNDDTTILDKLRLQNLRSFTGQDVLPEARYGRFRIPFDGSDIGELG<br>AALDPNEHEKGMDMCSANPAYIGKKYRYAYACGAVRPCNFPNTLTKID<br>LVEKKAKNWYEEGAVPSEPFFVARPGATAEDDGVVISVISDKNGEGYA<br>LVLDGSNFEEIARAKFPYGLPYGLHGCWVPPK                                                                                                                                 |
| CsCCD7  | MHSISHRLLLFPFSPAVNRTLLPPPRHPILTTLAAASTETLIDRPDKTLKI<br>ATETETVIQDSPAAAYWDYQFLFLSQRAETRDPVPLRLVSGSLPTDFPR<br>GTYYLTPGLFADDHGSTVHPLDGHGYLRAFEGEKGISYSARYIRTE<br>AEREEREESGGWRFSYRGPFV LKGGRRVGNVKVMKNVANTS VVR<br>WGGKLMCMWEGGNPYEIEEGTLDTVGTVDLVGREGDVSVEEKKLVR<br>GWRKGLGEIGVDIAAGFLKPILQGVFGMPPKRLLSHYKIDPKRNRLLV<br>LSCNAEDMLLPRSNFIFYEFDSEFN LKQKKEFIIPDQLMIHDWAFTDNN<br>YIIIGNRIKLDVPGSMGAVSGMSPMISALSVNPSQQTSP IYLLPRSSHGE<br>NGQRDWREPIEAPAQLWALHVSNAFEERDDTTGDLEIQLLVSVCSYQ<br>WFNFQKMF GYNWKTGRLDPSFMNVVESKESLLPHLVQVSIQLDKKG<br>ACHGCSIAGSSDQWNRPADFPAINAAYSGQRNSFTYAGTNSGSRRFLP<br>HFPFDSVMKLNSSDGSVAMWSAGNRTFIGEPIYISKGEEEDDGYILVVE<br>YAVSKQRCYLVILDARNIGGANAMVAKLEV PKHLNFPLGFHGFWSAR<br>NH |
| CsNCED  | MTSTATSFMIGHQSSLLDSKLSKSRKHRKPLPRTIHCSTSSSSHSVIIDRP<br>SSTPSSYYPSSVIVREREEPLRSIDKT NKNVRTLDIKKAIEAPPMNIFQQ<br>AVSAVLDAVEDSFITNLLDKFYPLPKTSDPAIQIAGNFAPVEEQPPHDES<br>LPVTGRIPPFINGAYVRNGANPLFEPVAGHHLFDGDGMVHAVRLQNG<br>KATYSCRFTETERLRQERAIGRPVFPKAIGELHGHSGIAACSLFYARGL<br>AGIVDPHTGTGVANAGLIYFNDRLLAMSEDDL PYHVRI SQSGDLETVG<br>RYDFDQGQLDSPMIAHPKIDPATKELFALSYNVIQKPFLKYFRFSPDGEK<br>APDVEIPLAGPTMMNDFAITENFVVVPDQQVVF KLQEMIRGGSPVVY<br>DKEKTARFGILPKYASDASEMKWVDVPECFCFHFVNAWEDSETGEVV<br>VIGSSMTPADSIFNECDESLESVLSEIRLNPKTGKSTRRPILSPSNQFNLE<br>AGMVNRNRIGRKTRFAYLAIAEPWPKVSGFAKVDLSTGEVEKLIYGD<br>GKYGGEPYFVPREGSTREDDGYVLA FVHDEETSESELQIVNGTDMRL<br>EASVKLPSRVPGYGFHGTFIGSKELETQA               |

Supplemental Table S4 Sequences Alignment of *CCD4-1s* and their promoters from *L. barbarum* and *L. ruthenicum*

|                                                                                           |          |                                                                         |      |
|-------------------------------------------------------------------------------------------|----------|-------------------------------------------------------------------------|------|
| Alinement<br>of<br><i>LbCCD4-1</i><br>&<br><i>LrCCD4-1</i><br>nucleic<br>acid<br>sequence | LbCCD4-1 | ATGGATGCTTTCTCTTCTACTTTTCCTTTCTACATTATCACAACACCCTAAATCTCTTCTTTCTCCTTACA | 70   |
|                                                                                           | LrCCD4-1 | ATGGATGCTTTCTCTTCTACTTTTCCTTTCTACATTATCACAACACCCTAAATCTCTTCTTTCTCCTTACA | 70   |
|                                                                                           | LbCCD4-1 | ATTATTCTCCCAATTCACCATGTTCTCCTGCTCTAAAAGTTTCCTCCGTTAGAATGGAAGAAAGGCCACA  | 140  |
|                                                                                           | LrCCD4-1 | ATTATTCTCCCAATTCACCATGTTCTCCTGCTCTAAAAGTTTCCTCCGTTAGAATGGAAGAAAGGCCACA  | 140  |
|                                                                                           | LbCCD4-1 | AACTACCCTACTAGAACAAAACCACAAGAGAAGCCAACCCCTTCACCACCAAAACCAACTCCAAAAAAA   | 210  |
|                                                                                           | LrCCD4-1 | AACTACCCTACTAGAACAAAACCACAAGAGAAGCCAACCCCTTCACCACCAAAACCAACTCCAAAAAAA   | 210  |
|                                                                                           | LbCCD4-1 | GAATTACCTATAAAACCAATACCCTCAAGAACACCTCTAGAACCATCATTCCCTCCGTTATCTTCAATG   | 280  |
|                                                                                           | LrCCD4-1 | GAATTACCTATAAAACCAATACCCTCAAGAACACCTCTAGAACCATCATTCCCTCCGTTATCTTCAATG   | 280  |
|                                                                                           | LbCCD4-1 | CATTGACGATTTCATAAACTTTTCATTGATCCTCCTTGAGATCTTCTATTGATCCAAGGTATGTTCT     | 350  |
|                                                                                           | LrCCD4-1 | CATTGACGATTTCATAAACTTTTCATTGATCCTCCTTGAGATCTTCTATTGATCCAAGGTATGTTCT     | 350  |
|                                                                                           | LbCCD4-1 | CTCTGACAATTTGGCTCCAGTGGAGGAGCTTCCTCCTACTGAATGCGAAGTAGTGGAAGGCTCCCTTCCA  | 420  |
|                                                                                           | LrCCD4-1 | CTCTGACAATTTGGCTCCAGTGGAGGAGCTTCCTCCTACTGAATGCGAAGTAGTGGAAGGATCCCTTCCA  | 420  |
|                                                                                           | LbCCD4-1 | CCTTGCCTAGACGGCGCGTACATCCGAAATGGCCCTAACCTCAATATCTTCCACGTGGACCTTACCATC   | 490  |
|                                                                                           | LrCCD4-1 | CCTTGCCTAGACGGCGCGTACATCCGAAATGGCCCTAACCTCAATATCTTCCACGTGGACCTTACCATC   | 490  |
|                                                                                           | LbCCD4-1 | TTTTTGACGGAGATGGAATGCTTCACTCTATTAGAATTTCCCAAGGCAAGGTACACTCTGCAGTCGATA   | 560  |
|                                                                                           | LrCCD4-1 | TTTTTGACGGAGATGGAATGCTTCACTCTATTAGAATTTCCCAAGGCAAGGTACACTCTGCAGTCGATA   | 560  |
|                                                                                           | LbCCD4-1 | CGTTAAACTTACAAGTACACCATGAACGTGATGCCGGTTCTCCGGTTATCCCTAATGTCTTCTCCGGT    | 630  |
|                                                                                           | LrCCD4-1 | CGTTAAACTTACAAGTACACCATGAACGTGATGCCGGTTCTCCGGTTATCCCTAATGTCTTCTCCGGT    | 630  |
|                                                                                           | LbCCD4-1 | TTCAACGGTCTAACAGCCTCGGCCGCGTGGTGCTATTACGCGGCTCGAGCAATTGCAGGACAATTCA     | 700  |
|                                                                                           | LrCCD4-1 | TTCAACGGTCTAACAGCCTCGGCCGCGTGGTGCTATTACGCGGCTCGAGCAATTGCAGGACAATTCA     | 700  |
|                                                                                           | LbCCD4-1 | ATCCCACAAATGGTATAGGCCTAGCAAACACAAGTTTGGCTTTATTCGGGGGTAAACTTTTCGCTATTGG  | 770  |
|                                                                                           | LrCCD4-1 | ATCCCACAAATGGTATAGGCCTAGCAAACACAAGTTTGGCTTTATTCGGGGGTAAACTTTTCGCTATTGG  | 770  |
|                                                                                           | LbCCD4-1 | TGAATCTGATTTACCATATGCAATAAAAAATAGCCCCAGATGGTGATATTATTACCCTCGGCCGTACGAC  | 840  |
|                                                                                           | LrCCD4-1 | TGAATCTGATTTACCATATGCAATAAAAAATAGCCCCAGATGGTGATATTATTACCCTCGGCCGTACGAC  | 840  |
|                                                                                           | LbCCD4-1 | TTTGACGGAAATCTTTTCATGAGCATGACAGCACATCCCAAAATCGACCCAGAACTAACGAGGCTTTTG   | 910  |
|                                                                                           | LrCCD4-1 | TTTGACGGAAATCTTTTCATGAGCATGACAGCACATCCCAAAATCGACCCAGAACTAACGAGGCTTTTG   | 910  |
|                                                                                           | LbCCD4-1 | CTTTCGGTTATGGCCCGATTCTCCGTTTTTAACTTACTTTCGATTGAACCAACGGTACGAAAACCC      | 980  |
|                                                                                           | LrCCD4-1 | CTTTCGGTTATGGCCCGATTCTCCGTTTTTAACTTACTTTCGATTGAACCAACGGTACGAAAACCC      | 980  |
|                                                                                           | LbCCD4-1 | GGACGTGCCAATATTCTCCATGACACGTCCGTCATTTCTTCATGATTTTGCAATCACGAAGAAATACGCC  | 1050 |
|                                                                                           | LrCCD4-1 | GGACGTGCCAATATTCTCCATGACACGTCCGTCATTTCTTCATGATTTTGCAATCACGAAGAAATACGCC  | 1050 |
|                                                                                           | LbCCD4-1 | ATATTTTCGGACATACAAATAGGAATGAACCAATAGGTTAATCATGGGTGGTTCACCCGTGGGTGCGG    | 1120 |
|                                                                                           | LrCCD4-1 | ATATTTTCGGACATACAAATAGGAATGAACCAATAGGTTAATCATGGGTGGTTCACCCGTGGGTGCGG    | 1120 |
|                                                                                           | LbCCD4-1 | ACTCGGGGAAAAATCCCCGACTTGGCGTAATTCACAGTTACGCCAAGGACGAGTCGAAAATGAGGTGGTT  | 1190 |
|                                                                                           | LrCCD4-1 | ACTCGGGGAAAAATCCCCGACTTGGCGTAATTCACAGTTACGCCAAGGACGAGTCGAAAATGAGGTGGTT  | 1190 |
|                                                                                           | LbCCD4-1 | TGATGTGCCAGGGTTTAATATTGTGCACGCGATAAACGCGTGGGATGAGGACGGTGGTGATACGATAGTG  | 1260 |
|                                                                                           | LrCCD4-1 | TGATGTGCCAGGGTTTAATATTGTGCACGCGATAAACGCGTGGGATGAGGACGGTGGTGATACGATAGTG  | 1260 |
|                                                                                           | LbCCD4-1 | TTGGTGGCACCGAATATATTATCGGTGGAACATACACTAGAGAGAAATGGATTGATACATGCATGTGTTG  | 1330 |
|                                                                                           | LrCCD4-1 | TTGGTGGCACCGAATATATTATCGGTGGAACATACACTAGAGAGAAATGGATTGATACATGCATGTGTTG  | 1330 |

|                                                                                                   |  |                         |                                                                              |      |
|---------------------------------------------------------------------------------------------------|--|-------------------------|------------------------------------------------------------------------------|------|
| Alinement<br>of<br>LbCCD4-1<br>&<br>LrCCD4-1<br>amino<br>sequences                                |  | LbCCD4-1                | AGAAAGTGAAGATAGATTTGAAGACAGGAATGGTGAGCAGACATCCTGTTTCTACCAGGAATCTTGACTT       | 1400 |
|                                                                                                   |  | LrCCD4-1                | AGAAAGTGAAGATAGATTTGAAGACAGGAATGGTGAGCAGACATCCTGTTTCTACCAGGAATCTTGACTT       | 1400 |
|                                                                                                   |  | LbCCD4-1                | TGGAGTCATCAATCCTGCTTATGTTGGGAAGAATAACAAGTATGTATATGCAGCCATTGGGGACCCTATG       | 1470 |
|                                                                                                   |  | LrCCD4-1                | TGGAGTCATCAATCCTGCTTATGTTGGGAAGAATAACAAGTATGTATATGCAGCCATTGGGGACCCTATG       | 1470 |
|                                                                                                   |  | LbCCD4-1                | CCAAAGGTAACAGGGGTAGCAAAATTAGACGTATCCGTAGCAGAAACAGATCGTCGCGATTGCATAGTGG       | 1540 |
|                                                                                                   |  | LrCCD4-1                | CCAAAGGTAACAGGGGTAGCAAAATTAGACGTATCCGTAGCAGAAACAGATCGTCGCGATTGCATAGTGG       | 1540 |
|                                                                                                   |  | LbCCD4-1                | CATGCCGACTATTGGAGAAGGCTGCTTCGGTGGTGAGCCTTTTTTGTGGCTAAAGATGCAAAACATCC         | 1610 |
|                                                                                                   |  | LrCCD4-1                | CATGCCGACTATTGGAGAAGGCTGCTTCGGTGGTGAGCCTTTTTTGTGGCTAAAGATGCAAAACATCC         | 1610 |
|                                                                                                   |  | LbCCD4-1                | TGAGGCTGATGAAGATGATGGCTACGTAGTGTATGTGCACAATGAGAAGACAGGGGAATCAAGATTC          | 1680 |
|                                                                                                   |  | LrCCD4-1                | TGAGGCTGATGAAGATGATGGCTACGTAGTGTATGTGCACAATGAGAAGACAGGGGAATCAAGATTC          | 1680 |
|                                                                                                   |  | LbCCD4-1                | TTGGTCATGGATGCAAAGTCCCCTAATCTTGACATTGTGGCTGCCGTAAATTGCCTCGTCGTGCCTT          | 1750 |
|                                                                                                   |  | LrCCD4-1                | TTGGTCATGGATGCAAAGTCCCCTAATCTTGACATTGTGGCTGCCGTAAATTGCCTCGTCGTGCCTT          | 1750 |
|                                                                                                   |  | LbCCD4-1                | ATGGTTTTACGGGCTTTTCGTACGGGAAAGTGATCTTAATAAGCTGTAG                            | 1800 |
|                                                                                                   |  | LrCCD4-1                | ATGGTTTTACGGGCTTTTCGTACGGGAAAGTGATCTTAATAAGCTGTAG                            | 1800 |
|                                                                                                   |  | LbCCD4-1                | MDAFSSTFLSTLSQHPKSLSPYNYSPNSPCSPALKVSSVRMEERPQTTTTRTKPQEKPTSPPKPTPKK         | 70   |
|                                                                                                   |  | LrCCD4-1                | MDAFSSTFLSTLSQHPKSLSPYNYSPNSPCSPALKVSSVRMEERPQTTTTRTKPQEKPTSPPKPTPKK         | 70   |
|                                                                                                   |  | LbCCD4-1                | ELPIKIPISRTPLEPSFPSVIFNAFDDFINTFIDPPLRSSIDPRYVLSDNFAPVDELPPTECEVVEGSLP       | 140  |
|                                                                                                   |  | LrCCD4-1                | ELPIKIPISRTPLEPSFPSVIFNAFDDFINTFIDPPLRSSIDPRYVLSDNFAPVDELPPTECEVVEGSLP       | 140  |
|                                                                                                   |  | LbCCD4-1                | PCLDGAYIRNGPNQYLP RGPYHLFDGDGMLHSIRISQ GKATLCSRYVKTYKYTIERDAGSPVIPNVFSG      | 210  |
|                                                                                                   |  | LrCCD4-1                | PCLDGAYIRNGPNQYLP RGPYHLFDGDGMLHSIRISQ GKATLCSRYVKTYKYTIERDAGSPVIPNVFSG      | 210  |
|                                                                                                   |  | LbCCD4-1                | FNGLTASAARGAITAARAIAGQFNPTNGIGLANTSLALFGGKLF AIGESDLPYA I KIAPDGDII TLGRHD   | 280  |
|                                                                                                   |  | LrCCD4-1                | FNGLTASAARGAITAARAIAGQFNPTNGIGLANTSLALFGGKLF AIGESDLPYA I KIAPDGDII TLGRHD   | 280  |
|                                                                                                   |  | LbCCD4-1                | FDGNLFMSMTAHPKIDPETNEAFAFRYGP IPPFLT YFRIEPNGTKTPDVPIFSMTRPSFLHDAITKKYA      | 350  |
|                                                                                                   |  | LrCCD4-1                | FDGNLFMSMTAHPKIDPETNEAFAFRYGP IPPFLT YFRIEPNGTKTPDVPIFSMTRPSFLHDAITKKYA      | 350  |
|                                                                                                   |  | LbCCD4-1                | IFSDIQIGMNP IEL IIRGGSPVGADSGKIPRLGVI PRYAKDESKMRWFDVPGFNIVHAINAWDEDGGDTIV   | 420  |
|                                                                                                   |  | LrCCD4-1                | IFSDIQIGMNP IEL IIRGGSPVGADSGKIPRLGVI PRYAKDESKMRWFDVPGFNIVHAINAWDEDGGDTIV   | 420  |
|                                                                                                   |  | LbCCD4-1                | LVAPNILSVEHTLERMDLIHACVEKVKIDLKTGMVSRHPVSTRNLDFGVINPAYVGKNNKYVYAAIGDPM       | 490  |
|                                                                                                   |  | LrCCD4-1                | LVAPNILSVEHTLERMDLIHACVEKVKIDLKTGMVSRHPVSTRNLDFGVINPAYVGKNNKYVYAAIGDPM       | 490  |
|                                                                                                   |  | LbCCD4-1                | PKVTGVAKL DVSVAETDRRD C I VACRLFEGECFGGEPFFVAKDANNPEADED DGYVVS YVHNEKTGESRF | 560  |
|                                                                                                   |  | LrCCD4-1                | PKVTGVAKL DVSVAETDRRD C I VACRLFEGECFGGEPFFVAKDANNPEADED DGYVVS YVHNEKTGESRF | 560  |
|                                                                                                   |  | LbCCD4-1                | LVMDAKSPNLDIVA AVKLPRRVPYGFHGLFVRESDLNKL                                     | 599  |
|                                                                                                   |  | LrCCD4-1                | LVMDAKSPNLDIVA AVKLPRRVPYGFHGLFVRESDLNKL                                     | 599  |
| Alinement<br>of<br>LbCCD4-1 <sub>pro</sub><br>&<br>LbCCD4-1 <sub>pro</sub><br>nucleic<br>sequence |  | LbCCD4-1 <sub>pro</sub> | CCCTTCTAATTTTTTTTCCCCGTCACCCTCGCCTTCACGACTCAACTATATTTCAATTACAAGTAAACATT      | 70   |
|                                                                                                   |  | LrCCD4-1 <sub>pro</sub> | CCCTTCTAATTTTTTTTCCCCGTCACCCTCGCCTTCACGACTCAACTATATTTCAATTACAAGTAAACATT      | 70   |
|                                                                                                   |  | LbCCD4-1 <sub>pro</sub> | AGACTTCTCCATAGAATCTCCAAATAAGCACCAATATTTTAAATACAGAAAAGAATTCTCATCAAATTTG       | 140  |
|                                                                                                   |  | LrCCD4-1 <sub>pro</sub> | AGACTTCTCCATAGAATCTCCAAATAAGCACCAATATTTTAAATACAGAAAAGAATTCTCATCAAATTTG       | 140  |
|                                                                                                   |  | LbCCD4-1 <sub>pro</sub> | AGGAGAAAATAAATGGGTGTATTCTTTAAGCTTCAGCAAAATTTAAATGTCTTAAATTTAGGTGAAAACACC     | 210  |
|                                                                                                   |  | LrCCD4-1 <sub>pro</sub> | AGGAGAAAATAAATGGGTGTATTCTTTAAGCTTCAGCAAAATTTAAATGTCTTAAATTTAGGTGAAAACACC     | 210  |
|                                                                                                   |  | LbCCD4-1 <sub>pro</sub> | AAAAAACCCATGAGTAATGTCAAGGGAATAGATGTGATTTTGAATAATTCTTGAAGTAAAGAGTGAG          | 280  |
|                                                                                                   |  | LrCCD4-1 <sub>pro</sub> | AAAAAACCCATGAGTAATGTCAAGGGAATAGATGTGATTTTGAATAATTCTTGAAGTAAAGAGTGAG          | 280  |
|                                                                                                   |  | LbCCD4-1 <sub>pro</sub> | AATGAAGCACATTGTGTTTTATTGGGATTTTTTAGAGCACAGTGTGTATGAAGAAATTAAGATCCATT         | 350  |
|                                                                                                   |  | LrCCD4-1 <sub>pro</sub> | AATGAAGCACATTGTGTTTTATTGGGATTTTTTAGAGCACAGTGTGTATGAAGAAATTAAGATCCATT         | 350  |
|                                                                                                   |  | LbCCD4-1 <sub>pro</sub> | GTAAAAAATTTAAAAACAAGTGCTTGGTTGCGTAAAGAAGAGAACTGCGTGACAAGGTAGCAGTATA          | 420  |
|                                                                                                   |  | LrCCD4-1 <sub>pro</sub> | GTAAAAAATTTAAAAACAAGTGCTTGGTTGCGTAAAGAAGAGAACTGCGTGACAAGGTAGCAGTATA          | 420  |

|                         |                                                                          |      |
|-------------------------|--------------------------------------------------------------------------|------|
| LbCCD4-1 <sub>pro</sub> | TATCATTATCCCACCTTTTGTAGTTAAGAAGATATTACTCAATTAATGAAATAAACAAATATAAATAGCTAC | 490  |
| LrCCD4-1 <sub>pro</sub> | TATCATTATCCCACCTTTTGTAGTTAAGAAGATATTACTCAATTAATGAAATAAACAAATATAAATAGCTAC | 490  |
| LbCCD4-1 <sub>pro</sub> | TAAATGAATCTAGCCTTTAAATTTCCGTTTGCCGCGTTGCATTATAAGAAGTGCTATTGTGAATTACT     | 560  |
| LrCCD4-1 <sub>pro</sub> | TAAATGAATCTAGCCTTTAAATTTCCGTTTGCCGCGTTGCATTATAAGAAGTGCTATTGTGAATTACT     | 560  |
| LbCCD4-1 <sub>pro</sub> | GGAGTCTGAAGCTAACGTTACTGGAGTTGAGCAAAGATATAGAGGGAGATCTCTGTAAATTGTCCATT     | 630  |
| LrCCD4-1 <sub>pro</sub> | GGAGTCTGAAGCTAACGTTACTGGAGTTGAGCAAAGATATAGAGGGAGATCTCTGTAAATTGTCCATT     | 630  |
| LbCCD4-1 <sub>pro</sub> | ATCTATAACATCCACGGGTACTTTTTTAAATATCACTAGAAGAACTGAATTTCAATTGTTTAATATT      | 700  |
| LrCCD4-1 <sub>pro</sub> | ATCTATAACATCCACGGGTACTTTTTTAAATATCACTAGAAGAACTGAATTTCAATTGTTTAATATT      | 700  |
| LbCCD4-1 <sub>pro</sub> | TGTTTAGAAATATGTGGTGCATTTAATTTTGGTCTCAAAAAACAAAATAAAATTTTAAGTTTACAGAC     | 770  |
| LrCCD4-1 <sub>pro</sub> | TGTTTAGAAATATGTGGTGCATTTAATTTTGGTCTCAAAAAACAAAATAAAATTTTAAGTTTACAGAC     | 770  |
| LbCCD4-1 <sub>pro</sub> | TAATGCTCTATTTTAAAAAGGCTTTTGGGACTCGCCTCTGAGTGGACACTTGCAAAAGTCGTGAAATTC    | 840  |
| LrCCD4-1 <sub>pro</sub> | TAATGCTCTATTTTAAAAAGGCTTTTGGGACTCGCCTCTGAGTGGACACTTGCAAAAGTCGTGAAATTC    | 840  |
| LbCCD4-1 <sub>pro</sub> | ACATGTAGGGTTTAGTTCTGTGAGGCTTAATGTGTCACGGTTATACAACACATTTGATATCAATTGCATA   | 910  |
| LrCCD4-1 <sub>pro</sub> | ACATGTAGGGTTTAGTTCTGTGAGGCTTAATGTGTCACGGTTATACAACACATTTGATATCAATTGCATA   | 910  |
| LbCCD4-1 <sub>pro</sub> | GACTAATAATGTCCTCAATGCTTATTTAGTACATGATGCGTTAAGGGCATTTTTGTAGCCTAATAGGTGAA  | 980  |
| LrCCD4-1 <sub>pro</sub> | GACTAATAATGTCCTCAATGCTTATTTAGTACATGATGCGTTAAGGGCATTTTTGTAGCCTAATAGGTGAA  | 980  |
| LbCCD4-1 <sub>pro</sub> | AGGAGGGGCAAATTTGATCCAATAGTGCGAAGGAGGGCATTTTTGAATCATTCTAATACGTTAAAGAGT    | 1050 |
| LrCCD4-1 <sub>pro</sub> | AGGAGGGGCAAATTTGATCCAATAGTGCGAAGGAGGGCATTTTGAATCATTCTAATACGTTAAAGAGT     | 1050 |
| LbCCD4-1 <sub>pro</sub> | AATTTTGACTCTTTCCGTATTATAAATTTAGAAATAAGGACATCAGGCGTTAATAACTGGACTATACTT    | 1120 |
| LrCCD4-1 <sub>pro</sub> | AATTTTGACTCTTTCCGTATTATAAATTTAGAAATAAGGACATCAGGCGTTAATAACTGGACTATACTT    | 1120 |
| LbCCD4-1 <sub>pro</sub> | TATTTCTATTTTTTTTCCACATATTTACGAATCTCTTAATCCACATACATGATTGTACTAAAGCTATT     | 1190 |
| LrCCD4-1 <sub>pro</sub> | TATTTCTATTTTTTTTCCACATATTTACGAATCTCTTAATCCACATACATGATTGTACTAAAGCTATT     | 1190 |
| LbCCD4-1 <sub>pro</sub> | GAGTTTAGCCGAATCTGTACGTAACCTTCTAGCTTGCCCTTGCTCACCGAACAAACTTTGTACTAAGTCA   | 1260 |
| LrCCD4-1 <sub>pro</sub> | GAGTTTAGCCGAATCTGTACGTAACCTTCTAGCTTGCCCTTGCTCACCGAACAAACTTTGTACTAAGTCA   | 1260 |
| LbCCD4-1 <sub>pro</sub> | CTAAACAATATTTGTAACATAAAAGGTCACCTCAATTTTGCTTAAGTATCATAAAAATTGACATTTAC     | 1330 |
| LrCCD4-1 <sub>pro</sub> | CTAAACAATATTTGTAACATAAAAGGTCACCTCAATTTTGCTTAAGTATCATAAAAATTGACATTTAC     | 1330 |
| LbCCD4-1 <sub>pro</sub> | ATTTACTTTTAGTGACATTCTACAATTTACTTAGATTTATTGAATCTATAATGAATCAATCAAGTTGG     | 1400 |
| LrCCD4-1 <sub>pro</sub> | ATTTACTTTTAGTGACATTCTACAATTTACTTAGATTTATTGAATCTATAATGAATCAATCAAGTTGG     | 1400 |
| LbCCD4-1 <sub>pro</sub> | GGAGATAAGCCAACTTGATATTTAGTTTTAGTAGAGTTTTAATGAAAAACGAAAAACCACCAATTGAC     | 1470 |
| LrCCD4-1 <sub>pro</sub> | GGAGATAAGCCAACTTGATATTTAGTTTTAGTAGAGTTTTAATGAAAAACGAAAAACCACCAATTGAC     | 1470 |
| LbCCD4-1 <sub>pro</sub> | CATACGTGAACCTTAACCTCAATTTATGATTGTCATAAACTTGACTTCCTTTTCAGTTTTAATAGAGTTC   | 1540 |
| LrCCD4-1 <sub>pro</sub> | CATACGTGAACCTTAACCTCAATTTATGATTGTCATAAACTTGACTTCCTTTTCAGTTTTAATAGAGTTC   | 1540 |
| LbCCD4-1 <sub>pro</sub> | CAGTAAAAAAAAGGAAAAATCAAAATAGATCATACGTGAAATTACTTTCAATTTATGTGTGCATAAACG    | 1610 |
| LrCCD4-1 <sub>pro</sub> | CAGTAAAAAAAAGGAAAAATCAAAATAGATCATACGTGAAATTACTTTCAATTTATGTGTGCATAAACG    | 1610 |
| LbCCD4-1 <sub>pro</sub> | CCTTAATTGGTCAGGTGAAAAGAGAATTAGAAATTTTGTAGTGAGATAAGCAAACCTTGATTCTTTTTAC   | 1680 |
| LrCCD4-1 <sub>pro</sub> | CCTTAATTGGTCAGGTGAAAAGAGAATTAGAAATTTTGTAGTGAGATAAGCAAACCTTGATTCTTTTTAC   | 1680 |
| LbCCD4-1 <sub>pro</sub> | GTATTATTAGAATTCTAATGAAAAATGGAAGATCGCCCGATTACTATAAAAAGAAAATTAGTTGTGCAGA   | 1750 |
| LrCCD4-1 <sub>pro</sub> | GTATTATTAGAATTCTAATGAAAAATGGAAGATCGCCCGATTACTATAAAAAGAAAATTAGTTGTGCAGA   | 1750 |
| LbCCD4-1 <sub>pro</sub> | TAATAGAGTGTCTTTCACTGCCCCACTTTAGGAAAGTGTGGTGTCCCTAAATGAATAGTCCCTGTCT      | 1820 |
| LrCCD4-1 <sub>pro</sub> | TAATAGAGTGTCTTTCACTGCCCCACTTTAGGAAAGTGTGGTGTCCCTAAATGAATAGTCCCTGTCT      | 1820 |
| LbCCD4-1 <sub>pro</sub> | TTTGCCTTACTCCTCACTCTCCTACTCCATAAATGGGCATGGAATCTCATAGTTAGATCATGCAAGCAC    | 1890 |
| LrCCD4-1 <sub>pro</sub> | TTTGCCTTACTCCTCACTCTCCTACTCCATAAATGGGCATGGAATCTCATAGTTAGATCATGCAAGCAC    | 1890 |
| LbCCD4-1 <sub>pro</sub> | TTATTTCTTTTTCCCTTTACTCTTTAGTATCAAACTTGTCTTCTTTCTTCAAGAAGAAACAGAA         | 1959 |
